# Supplementary material for: Upregulated Glycolysis Correlates With Clinical and Transcriptomic Significances in Head and Neck Squamous Cell Carcinoma
Source: Research Square preprint supplement (doi:10.21203/rs.3.rs-421251/v1), 2021-04-19
Supplement: Supplementary file 2 [file 7ef11a4ed30cf49500916959.xlsx]

## Sheet: Suppl. Table 1
Suppl. Table 1. The list of 2366 differentially expressed genes including 459 upregulated and 1907 downregulated genes in the glycolysis-high group
	log2FC	P-value	Adjusted P-value
SPINK6	3.94673	1.20861e-35	6.40169e-33
IFNK	3.49776	1.00328e-29	2.40535e-27
OR2L2	3.22838	1.1054e-18	4.49582e-17
FABP4	3.01812	3.00594e-21	1.87571e-19
DEFB103B	2.98602	1.19309e-19	5.745e-18
CASP14	2.90755	6.53889e-24	6.15413e-22
TRIML2	2.86699	2.93229e-21	1.83478e-19
TH	2.80007	1.46966e-26	2.10522e-24
OR2L13	2.7088	5.71382e-15	1.20834e-13
LCE3C	2.64269	6.8168e-11	6.73869e-10
CNGB1	2.60273	9.34134e-36	5.06568e-33
MUCL1	2.58408	1.0381e-18	4.24486e-17
KPRP	2.5183	2.75617e-20	1.49108e-18
FLG2	2.50733	1.12564e-14	2.29317e-13
LCE3A	2.49452	1.83213e-17	6.01502e-16
LOC100507127	2.45971	5.48066e-29	1.21192e-26
LINC00052	2.3762	9.32227e-12	1.08173e-10
LCE3D	2.37156	2.38381e-18	9.14036e-17
PSG5	2.35689	9.51628e-18	3.28398e-16
C1orf68	2.3493	1.42407e-20	8.02838e-19
PCDHGC5	2.34226	3.21925e-26	4.31303e-24
DEFB4A	2.29775	4.69615e-13	7.03218e-12
LCE2D	2.26649	5.40631e-09	3.66798e-08
MAGEA4	2.26333	1.31025e-08	8.30101e-08
PAEP	2.25623	7.30448e-22	4.98104e-20
KRT6C	2.21827	7.32331e-29	1.54441e-26
LCE3E	2.21518	6.05891e-15	1.27776e-13
CXCL11	2.19819	8.85168e-19	3.66556e-17
LCE1F	2.17018	2.00313e-14	3.87624e-13
CA9	2.15943	6.79281e-29	1.46984e-26
KRT6B	2.12576	1.97076e-30	5.34359e-28
ROS1	2.12557	4.04994e-16	1.05781e-14
OR56A3	2.12475	0.00056	0.00147044
PSG6	2.12344	3.14817e-11	3.33037e-10
IGFL1	2.1201	4.59541e-18	1.68272e-16
SLURP1	2.08251	1.26712e-13	2.08828e-12
LCE2B	2.08197	1.03649e-06	4.61707e-06
MIR31HG	2.07396	1.70508e-27	2.94203e-25
KRT73	2.06836	4.99452e-29	1.12629e-26
CSF2	2.0633	2.33746e-20	1.28586e-18
LCE2C	2.05361	1.05042e-07	5.6108e-07
DEFB4B	2.05094	9.05619e-11	8.77345e-10
IL24	2.02843	3.0122e-20	1.62189e-18
MT4	2.02432	1.77595e-08	1.09588e-07
LCE2A	2.00432	2.00369e-07	1.0164e-06
DSC1	2.00305	6.18008e-13	9.0403e-12
LOR	1.99214	2.80353e-11	3.00486e-10
CDA	1.98742	1.11733e-26	1.69656e-24
LCE6A	1.98734	2.24236e-06	9.36415e-06
KRT37	1.98663	8.62966e-20	4.26354e-18
KRT14	1.98211	6.8878e-29	1.46984e-26
HEPHL1	1.97111	3.91382e-19	1.72754e-17
LCE1A	1.96532	8.32926e-08	4.52762e-07
TGIF2LX	1.95591	0.00686344	0.0141527
LGALS17A	1.95321	8.32166e-15	1.71835e-13
OR4D6	1.94297	2.55884e-14	4.84456e-13
SH2D5	1.94154	4.25768e-27	7.13037e-25
PSG1	1.9414	2.57377e-13	4.03999e-12
NEFM	1.94115	4.53773e-11	4.63875e-10
LCE3B	1.93912	3.11672e-06	1.26965e-05
GLDC	1.9379	9.74404e-16	2.37613e-14
SPRR2G	1.91811	1.63483e-11	1.81737e-10
PNLIPRP3	1.91667	6.13552e-12	7.37428e-11
KRT16P3	1.91036	2.95047e-26	3.97633e-24
VSIG8	1.91007	1.46922e-12	1.99066e-11
CRCT1	1.89646	2.00153e-13	3.19236e-12
C20orf141	1.89375	4.19241e-15	9.04226e-14
KRT16	1.89328	1.03459e-21	6.81105e-20
KLK7	1.88589	8.1779e-16	2.0158e-14
KRT26	1.88273	2.34986e-14	4.48245e-13
LOC339240	1.87592	9.05725e-27	1.41293e-24
LINC00460	1.8263	1.66361e-18	6.5441e-17
KRT16P2	1.82247	6.65716e-23	5.57439e-21
KLK5	1.81685	6.48235e-13	9.434e-12
IFNA1	1.81366	8.06464e-12	9.42433e-11
LOC730755	1.8131	4.43482e-11	4.54579e-10
L1CAM	1.8084	3.46116e-19	1.54571e-17
RGS20	1.80833	2.49398e-36	1.49481e-33
KRT74	1.79049	2.82834e-26	3.83442e-24
SPINK7	1.78978	2.89921e-08	1.72094e-07
PSG4	1.78204	3.80363e-11	3.94317e-10
IGFL3	1.78143	3.03894e-09	2.14421e-08
KRT35	1.76929	4.75222e-19	2.06953e-17
APOC3	1.76822	0.00137741	0.00332188
KRT75	1.76661	4.94269e-21	2.91644e-19
IL1RL1	1.76407	3.95734e-17	1.24149e-15
MYO7B	1.75388	1.12986e-15	2.69745e-14
ZFP42	1.71241	4.33718e-07	2.07354e-06
TMEM239	1.70916	3.46853e-11	3.63549e-10
KRT1	1.70699	4.62201e-08	2.63111e-07
GJB2	1.70361	1.11927e-24	1.19124e-22
KRT86	1.70346	4.00551e-34	1.72131e-31
SERPINE1	1.70118	2.71835e-27	4.65512e-25
FOLR3	1.69872	2.79977e-12	3.59163e-11
SFTA1P	1.69634	2.46399e-13	3.88373e-12
CGB8	1.69631	2.80903e-11	3.00933e-10
NDRG1	1.69479	1.17393e-55	4.45623e-52
MAGEB1	1.69192	0.0136461	0.0261752
FGF5	1.68434	3.75526e-12	4.69685e-11
SMEK3P	1.68276	0.00278845	0.00629307
LYNX1	1.68017	4.25812e-16	1.10585e-14
KRT17	1.67215	1.38617e-29	3.22157e-27
HAL	1.67014	7.53106e-11	7.39024e-10
MMP10	1.66812	3.19302e-12	4.04698e-11
VEGFC	1.662	7.76183e-25	8.37836e-23
IGFL2	1.66186	5.06413e-13	7.5386e-12
CAV1	1.65592	5.37117e-35	2.54862e-32
RPSAP52	1.64662	5.32657e-18	1.91655e-16
KRT27	1.64425	4.43523e-14	7.99184e-13
RFPL1	1.6433	2.47136e-06	1.02453e-05
CDSN	1.6431	2.54742e-09	1.8274e-08
DMKN	1.64198	2.26798e-17	7.34787e-16
HTR7	1.63846	9.60933e-23	7.87273e-21
KRT2	1.63518	1.99445e-10	1.79123e-09
CT62	1.62729	2.12448e-12	2.79049e-11
PAGE2	1.62066	0.00789696	0.016049
MT2A	1.62037	2.49545e-23	2.14477e-21
FABP5P3	1.61939	1.63264e-19	7.73077e-18
WFDC12	1.6093	4.90428e-08	2.7793e-07
KRT25	1.6092	5.01451e-18	1.81864e-16
CA2	1.60594	6.90635e-22	4.73792e-20
DSG1	1.60192	1.04418e-09	8.16414e-09
SLC6A11	1.59709	1.8104e-15	4.11515e-14
CPA4	1.58735	1.06512e-16	3.09427e-15
TGFBI	1.58301	2.17001e-25	2.61503e-23
ANGPTL4	1.57957	7.18008e-30	1.78126e-27
NIPAL4	1.57697	1.08156e-20	6.18935e-19
EPGN	1.57293	1.34526e-10	1.25624e-09
KRTDAP	1.56964	2.29135e-09	1.65939e-08
GYG2P1	1.56494	3.19012e-06	1.29747e-05
LINC00520	1.5636	1.14931e-14	2.33096e-13
LOC727677	1.5626	4.80072e-10	4.01329e-09
KRT34	1.55975	7.25244e-15	1.51265e-13
NEFL	1.55333	2.9512e-13	4.57256e-12
KRT6A	1.55312	3.36165e-31	1.03466e-28
LOC100131726	1.55162	3.62745e-18	1.35219e-16
TTTY16	1.54866	0.000494101	0.00131269
WARS	1.54094	4.18952e-22	3.02771e-20
MMP1	1.54079	4.41997e-14	7.97345e-13
SBSN	1.53705	1.43043e-11	1.6049e-10
CHRNA9	1.53691	8.81613e-11	8.56114e-10
CLDN17	1.53233	1.46931e-06	6.32728e-06
CNFN	1.52756	1.01715e-11	1.1718e-10
AREG	1.52624	1.19323e-17	4.06841e-16
PSG7	1.52599	5.56009e-07	2.60569e-06
LOC100216001	1.5215	9.78757e-16	2.38419e-14
SMR3B	1.51502	0.0260645	0.0467437
IL20	1.51379	1.27005e-10	1.1899e-09
GSDMA	1.50601	2.11349e-11	2.3065e-10
PPBP	1.50432	2.24886e-09	1.63173e-08
TLL1	1.50397	1.76512e-15	4.02024e-14
PTHLH	1.49847	2.56933e-19	1.17982e-17
MIR31	1.49579	6.86055e-05	0.000217536
MMP3	1.4932	7.09602e-12	8.40015e-11
GOLGA7B	1.49319	3.35899e-19	1.50896e-17
FAM25A	1.489	9.88765e-09	6.37963e-08
ANXA13	1.48393	2.26508e-12	2.96368e-11
COL17A1	1.47718	2.28469e-22	1.75798e-20
MT1E	1.47679	1.69282e-16	4.7019e-15
S100A7	1.4764	1.90567e-09	1.40692e-08
GJB6	1.46989	1.88369e-15	4.26895e-14
PAGE2B	1.46619	6.10625e-05	0.000195606
AADACL3	1.46193	0.000127654	0.000382005
IL13RA2	1.46151	2.5042e-10	2.1996e-09
LGALS7	1.45975	1.12679e-14	2.29346e-13
SLC22A1	1.45884	2.08291e-12	2.73905e-11
F3	1.45848	4.57871e-20	2.38093e-18
ERVV-2	1.45771	1.92943e-05	6.77322e-05
MRGPRX3	1.45266	1.17961e-09	9.11972e-09
TRIM58	1.4488	2.73448e-08	1.6291e-07
DPPA2	1.44433	0.00191744	0.00448584
PAQR5	1.44259	6.66784e-20	3.38233e-18
LOC731424	1.4413	1.95599e-14	3.79145e-13
DSCAM	1.43875	4.34014e-10	3.65709e-09
KRT84	1.43812	2.81926e-13	4.38604e-12
PGF	1.43347	4.71463e-26	6.24305e-24
LCE1D	1.43316	0.000144741	0.000428356
DHRS2	1.43203	7.66601e-12	9.01865e-11
CCBE1	1.42974	6.87346e-13	9.93337e-12
S100A2	1.42896	1.42865e-26	2.05942e-24
FGL1	1.42576	1.87886e-07	9.59053e-07
FLRT3	1.42569	2.24248e-11	2.44027e-10
KLK9	1.42473	6.60252e-10	5.37068e-09
CXCL10	1.42411	5.74842e-10	4.7317e-09
MRGPRX4	1.41926	2.96971e-05	0.000100727
PLA2G2F	1.41705	9.51173e-09	6.15977e-08
ODZ2	1.4165	1.48701e-18	5.90038e-17
NT5E	1.41541	1.28193e-18	5.16765e-17
ARL14	1.41522	9.31619e-11	8.99854e-10
PSG9	1.41503	7.14993e-09	4.74772e-08
NAA11	1.41451	9.96964e-06	3.69277e-05
LOC100507205	1.41123	0.00683572	0.0141049
PLA2G4D	1.40869	1.25629e-08	7.98142e-08
PSG11	1.40648	3.16425e-05	0.000106769
LGALS7B	1.40471	1.17448e-12	1.62122e-11
IFNE	1.40222	1.30479e-12	1.78379e-11
TTR	1.4007	0.00144225	0.00346287
LYPD5	1.40036	1.58616e-15	3.66349e-14
ELFN2	1.39779	4.34556e-10	3.6603e-09
NELL2	1.39666	1.3948e-13	2.28712e-12
C6orf7	1.39588	8.86426e-05	0.000275058
CDH3	1.39405	2.55561e-43	2.53073e-40
SERPINB4	1.39034	2.97522e-10	2.57167e-09
NEU2	1.38711	1.72652e-05	6.12797e-05
KLK14	1.38695	1.70222e-06	7.24128e-06
CST6	1.38007	2.06949e-11	2.26163e-10
UPP1	1.37912	9.44986e-22	6.31173e-20
WNT7A	1.37908	6.47841e-14	1.13502e-12
FABP5	1.37898	1.53184e-15	3.54925e-14
CYP4F22	1.37723	1.20909e-08	7.70299e-08
FLG	1.37231	6.97383e-08	3.83755e-07
NRG1	1.37207	1.09304e-16	3.1633e-15
CGB	1.3614	2.32333e-10	2.05659e-09
FGFBP1	1.35532	7.5531e-18	2.65477e-16
LAMA3	1.35243	1.43943e-19	6.87305e-18
BPIFC	1.3485	3.92079e-07	1.88955e-06
LOC339442	1.34774	1.54404e-07	8.0016e-07
S100A12	1.34745	2.15998e-09	1.57325e-08
TRIML1	1.34278	4.82776e-07	2.28791e-06
EREG	1.33884	2.43583e-08	1.46227e-07
SATL1	1.33766	2.1282e-05	7.42637e-05
RPE65	1.33756	4.70216e-06	1.84894e-05
FGA	1.33238	2.23093e-05	7.74803e-05
GDPD2	1.332	6.41982e-09	4.29799e-08
INHBA	1.33112	1.06651e-12	1.48477e-11
SPRR1B	1.33103	1.58636e-10	1.45279e-09
LAMC2	1.32748	2.30146e-18	8.86938e-17
SDR9C7	1.3268	1.86269e-09	1.37966e-08
PLA2G4E	1.32625	2.87398e-10	2.49735e-09
KLK8	1.32129	5.85517e-10	4.81087e-09
BNIP3	1.31684	2.03753e-34	8.92438e-32
KRT12	1.31665	1.07436e-15	2.57846e-14
BATF2	1.31502	5.72209e-12	6.91753e-11
CES5A	1.30972	1.44085e-06	6.21649e-06
C1orf180	1.30835	4.27325e-07	2.04728e-06
PRMT8	1.30784	3.30291e-06	1.34047e-05
SLC2A1	1.3071	2.1037e-35	1.04161e-32
LIPG	1.30614	3.31196e-13	5.08996e-12
CLCA2	1.306	8.92102e-24	8.25956e-22
CARD18	1.30591	8.92384e-07	4.03593e-06
CSPG4	1.30151	1.15852e-15	2.7572e-14
IGFBP6	1.30108	5.50332e-12	6.68143e-11
LOC151475	1.30102	2.73003e-12	3.507e-11
AJAP1	1.30036	7.97936e-09	5.24042e-08
FGB	1.3001	0.000298854	0.000829277
KRTAP11-1	1.29897	0.00324871	0.00721597
ARG1	1.2976	4.39578e-06	1.74088e-05
SPANXN5	1.29738	0.00214291	0.00496409
CDH16	1.29519	4.61538e-08	2.62925e-07
2020-12-01	1.2943	4.26602e-08	2.45237e-07
ALOX15B	1.2937	1.25325e-09	9.63675e-09
NTSR1	1.28961	1.32865e-06	5.77178e-06
MLK7-AS1	1.28885	1.38221e-26	2.00517e-24
PYGL	1.28402	1.40338e-30	3.85102e-28
ANKRD31	1.27979	6.39745e-11	6.36003e-10
OR2W3	1.27978	3.89917e-05	0.000129381
LOC100188947	1.27953	1.52253e-10	1.3994e-09
KRT10	1.27695	1.49038e-07	7.73586e-07
SLCO1B3	1.27413	1.78194e-06	7.54939e-06
SLC38A5	1.27352	5.13961e-15	1.09681e-13
LEPREL1	1.27173	2.92437e-14	5.46395e-13
CYP27B1	1.27093	5.19753e-19	2.24628e-17
GBP5	1.27066	3.77643e-10	3.2094e-09
LDHA	1.26961	2.24329e-78	5.10932e-74
LOC728724	1.26893	2.82447e-05	9.61012e-05
OASL	1.26764	8.08972e-15	1.67806e-13
MT1L	1.26738	1.50206e-10	1.38393e-09
POU3F1	1.2667	7.50338e-12	8.84102e-11
KRTAP9-8	1.26471	0.00787931	0.0160204
TGM1	1.26337	4.70293e-10	3.93801e-09
RHOD	1.25494	4.14364e-21	2.48357e-19
TREM1	1.25456	1.34843e-12	1.84014e-11
FAM46B	1.25399	2.69444e-14	5.07599e-13
KRT3	1.25265	5.93796e-15	1.2537e-13
SPINK9	1.25222	0.000848958	0.00214486
C10orf99	1.2501	6.29774e-10	5.14113e-09
FBLIM1	1.24998	2.03332e-38	1.44722e-35
PSG2	1.24801	0.000318642	0.00088011
NDUFA4L2	1.24475	3.21908e-12	4.07548e-11
SLC6A2	1.23818	3.85156e-09	2.67775e-08
KLK3	1.23701	0.00161459	0.003833
KCTD11	1.23542	9.20506e-35	4.19309e-32
SSX6	1.23532	0.0003061	0.000848039
ITGA3	1.23328	1.01637e-26	1.57475e-24
SERPINB3	1.2314	3.95198e-09	2.74088e-08
NGF	1.22864	1.36398e-10	1.27163e-09
TEX29	1.2274	1.85498e-13	2.98368e-12
SFN	1.22539	3.11672e-21	1.92898e-19
MT1JP	1.22302	1.0169e-11	1.1718e-10
SLC22A3	1.22044	1.53195e-10	1.40692e-09
PLEK2	1.21829	3.79243e-24	3.67559e-22
MICALCL	1.21818	1.18283e-15	2.8092e-14
GUCA1C	1.21779	1.35309e-05	4.88633e-05
ENDOU	1.21645	4.70457e-07	2.23511e-06
SLCO1B7	1.21579	8.30278e-06	3.12156e-05
GPR68	1.2139	2.10215e-23	1.82742e-21
FOSL1	1.21337	3.35792e-19	1.50896e-17
CRYGC	1.21295	0.000664285	0.00171617
C11orf91	1.21118	7.11306e-16	1.77834e-14
PNMA5	1.21029	8.43946e-05	0.000263059
PSORS1C1	1.20798	1.20124e-11	1.36797e-10
FLJ42969	1.20201	7.30349e-10	5.88413e-09
KRT82	1.20159	7.33059e-12	8.65983e-11
AHNAK2	1.19914	6.55702e-23	5.5108e-21
EPHA8	1.1974	7.70006e-07	3.52374e-06
GPR50	1.19578	0.000560928	0.00147236
CDH18	1.19487	2.34472e-05	8.09755e-05
TSIX	1.19432	2.63302e-08	1.57442e-07
IL8	1.18813	2.04098e-09	1.49327e-08
CLIC3	1.18669	9.75443e-11	9.39395e-10
CA12	1.18409	1.23517e-22	9.90572e-21
THSD1	1.18263	3.53316e-20	1.88017e-18
FAM115C	1.17955	9.91095e-32	3.27148e-29
LOC729987	1.1767	0.000887656	0.00223173
TUBB2A	1.17547	7.5026e-19	3.14694e-17
LIPK	1.17249	2.51568e-07	1.25624e-06
SCNN1D	1.17237	2.87018e-09	2.03648e-08
LPAR3	1.17037	6.17459e-22	4.32534e-20
ADM	1.16956	2.25225e-22	1.74481e-20
IL1A	1.16949	2.3269e-09	1.68246e-08
LOC100288077	1.16898	1.04997e-12	1.46263e-11
S100A7L2	1.16773	0.000153294	0.00045103
TSPAN10	1.16736	4.59651e-13	6.89203e-12
CGB5	1.16279	1.14718e-10	1.08687e-09
IVL	1.16137	9.50916e-09	6.15977e-08
TUBA4A	1.15951	2.97824e-22	2.23869e-20
KRTAP9-4	1.15444	0.00505738	0.010727
CTSL2	1.15325	3.1013e-18	1.16752e-16
GALNT6	1.15283	1.73339e-15	3.95589e-14
TUBB6	1.15224	1.23913e-39	9.73185e-37
BNC1	1.15076	1.81591e-25	2.21173e-23
RUNDC3A	1.14935	3.55293e-11	3.71199e-10
KRT28	1.14739	6.82914e-07	3.15562e-06
ZPLD1	1.14628	3.53231e-08	2.0634e-07
LHX1	1.14487	5.49702e-07	2.57826e-06
TMEM92	1.14309	5.1607e-16	1.32365e-14
CARD17	1.1399	7.45946e-12	8.79383e-11
AKNAD1	1.13959	1.78146e-10	1.6133e-09
LOC100507140	1.13899	9.17335e-08	4.95688e-07
F2RL1	1.13847	1.90689e-22	1.49248e-20
SPTLC3	1.13602	1.62542e-11	1.80865e-10
ANXA3	1.13254	1.71297e-18	6.71506e-17
ISG15	1.13236	6.6085e-11	6.54984e-10
ALPP	1.13138	1.89993e-05	6.68202e-05
TUBA4B	1.13035	6.29748e-18	2.23762e-16
SPANXN2	1.12916	0.000216052	0.000615979
CALB2	1.1287	3.87988e-08	2.24855e-07
LOC285205	1.12601	1.78324e-07	9.15371e-07
IL33	1.12297	1.01286e-07	5.42545e-07
SPRR2E	1.12254	1.47757e-05	5.30557e-05
KLK10	1.12011	4.77927e-08	2.71183e-07
IQCF1	1.1175	1.86265e-05	6.56509e-05
UPK1A	1.11742	1.27393e-05	4.62612e-05
TMPRSS15	1.11624	0.000769343	0.00196046
DCBLD1	1.11583	2.34295e-20	1.28586e-18
UCA1	1.11466	2.86777e-08	1.70405e-07
ACTN1	1.11318	3.69315e-31	1.12154e-28
SLC47A2	1.11176	1.91592e-09	1.41357e-08
IL1B	1.11032	2.6641e-10	2.32749e-09
PPP2R2C	1.10952	5.89358e-13	8.66045e-12
KYNU	1.10835	1.26632e-10	1.18739e-09
KRT5	1.10741	7.23557e-27	1.15365e-24
PRR9	1.10499	0.00059821	0.00155998
CXorf28	1.10318	6.85831e-10	5.55691e-09
MMP13	1.10184	4.81293e-05	0.00015725
KIAA1609	1.10158	2.45655e-36	1.49481e-33
LRAT	1.1001	0.000124474	0.000373349
EGLN3	1.09934	9.2735e-13	1.30782e-11
CWH43	1.09803	4.75811e-05	0.000155571
THBD	1.09777	1.83519e-15	4.16732e-14
IFIT3	1.09598	1.80502e-11	1.99182e-10
TNFRSF12A	1.09597	3.77969e-25	4.39215e-23
IL1F10	1.09285	2.64251e-05	9.03013e-05
PKP3	1.09241	1.13976e-29	2.70407e-27
C7orf33	1.09204	0.0141554	0.0270541
KLK6	1.09102	4.8124e-06	1.88783e-05
CRNN	1.09097	0.00165529	0.00392228
TM4SF19-TCTEX1D2	1.08993	5.66474e-07	2.65092e-06
CYP26B1	1.08987	1.22245e-12	1.68335e-11
RAB38	1.08767	3.0635e-18	1.15712e-16
ZBED2	1.08635	1.99653e-13	3.18661e-12
RNF222	1.08454	8.8374e-07	4.0024e-06
SULT2B1	1.07978	1.38631e-09	1.05565e-08
MIR210	1.07824	8.4617e-09	5.52851e-08
CHST2	1.07702	7.39178e-13	1.06017e-11
PLK2	1.07572	9.54345e-22	6.35561e-20
ADAMTS15	1.07492	6.03196e-10	4.94241e-09
LOC154761	1.07206	1.15827e-26	1.71303e-24
PPYR1	1.07203	2.72034e-11	2.92671e-10
APLN	1.06977	7.63187e-16	1.89557e-14
RAET1G	1.06961	8.60255e-14	1.4765e-12
ANXA10	1.06855	4.07254e-05	0.000134624
OR10H1	1.06847	4.84166e-05	0.000158098
SLC6A15	1.06628	2.39581e-08	1.4409e-07
S100A9	1.06547	7.23352e-09	4.79484e-08
ITGB6	1.06509	9.18824e-11	8.89381e-10
PPIF	1.06463	1.34705e-27	2.34201e-25
MMP20	1.0638	9.34489e-05	0.0002884
S100A8	1.06372	8.05213e-08	4.38745e-07
SERPINB5	1.06316	1.39532e-21	9.13376e-20
OR10T2	1.0619	0.000880957	0.00221758
GJA1	1.06143	3.77099e-16	9.90635e-15
CEACAM19	1.06121	7.70589e-16	1.90979e-14
C4orf26	1.06073	1.40913e-05	5.07499e-05
C17orf77	1.05905	0.0029652	0.00665702
TGM5	1.05845	3.15411e-09	2.21996e-08
APOH	1.05703	0.00860913	0.0173202
FAM83A	1.05693	1.44495e-10	1.33944e-09
SYT16	1.05661	2.92452e-06	1.19757e-05
RNASE7	1.05398	1.20361e-07	6.3575e-07
CREG2	1.05385	3.92892e-07	1.89266e-06
INSL6	1.05038	0.0146516	0.0279091
ERVV-1	1.05033	0.000708759	0.00181787
ITGA5	1.04911	3.07743e-18	1.16046e-16
RIN1	1.04906	3.06912e-21	1.90469e-19
ARSI	1.04814	1.13019e-18	4.58844e-17
IFIT1	1.04813	2.11936e-09	1.54664e-08
C9orf169	1.04675	2.67436e-07	1.32878e-06
TUBB3	1.04668	7.38535e-16	1.84237e-14
GSDMC	1.04252	2.14044e-13	3.39725e-12
SAA1	1.04069	4.58471e-07	2.18272e-06
SFTPC	1.04069	0.00323939	0.00719739
KRT79	1.04045	6.46724e-09	4.32593e-08
ALOX12B	1.03907	7.57244e-06	2.86876e-05
LUZP4	1.03549	0.00822281	0.0166281
SERPINB7	1.03448	7.73317e-08	4.22477e-07
LOC100131551	1.03413	9.55392e-11	9.21253e-10
CAV2	1.03356	2.15714e-31	6.91987e-29
EPSTI1	1.03274	1.12691e-12	1.56217e-11
CXCR1	1.03121	3.42719e-07	1.66897e-06
RIMS3	1.02997	4.40486e-12	5.45542e-11
ITGA6	1.02758	5.07467e-19	2.20154e-17
IL31RA	1.02653	7.57061e-11	7.42584e-10
FSCN1	1.02612	4.94927e-34	2.08749e-31
PDZK1IP1	1.02505	2.81334e-09	1.9999e-08
VTRNA1-3	1.02451	8.64976e-05	0.000269025
IFFO2	1.02114	2.22547e-16	6.04421e-15
TRPV3	1.0201	1.47684e-08	9.23826e-08
IL37	1.01657	7.56781e-06	2.86748e-05
SERPINA12	1.01561	0.00201378	0.00468977
PGAM4	1.01549	6.31515e-62	2.87668e-58
IFIT1B	1.01471	1.29309e-06	5.62911e-06
TREX2	1.0146	1.14079e-06	5.03149e-06
PKLR	1.01399	3.21102e-07	1.57143e-06
DFNA5	1.01388	1.40114e-18	5.58887e-17
SUN3	1.01331	1.5486e-05	5.54312e-05
PLAU	1.01326	8.8819e-18	3.07906e-16
GBP1	1.01305	1.53184e-11	1.7123e-10
TPTE	1.01304	0.00334639	0.00741197
KRT72	1.01201	2.64273e-10	2.31059e-09
ALDH3B2	1.01165	9.7212e-11	9.3659e-10
LAMB3	1.0093	1.72752e-18	6.74888e-17
MYO1B	1.00847	6.863e-25	7.55129e-23
AMIGO2	1.00623	4.1619e-12	5.16857e-11
KCTD14	1.00574	2.6538e-06	1.09498e-05
ERO1L	1.0029	4.64889e-25	5.29415e-23
IRGM	1.00059	4.5788e-08	2.6137e-07
SERINC2	1.00016	2.19183e-21	1.39835e-19
S100A10	1.0001	2.69103e-32	9.57669e-30
SPAG8	-1.0002	2.22687e-14	4.2765e-13
ZNF879	-1.00065	1.47664e-14	2.91944e-13
SPINK2	-1.00075	8.61647e-08	4.67593e-07
DARC	-1.00143	1.16476e-07	6.17034e-07
CRYBB3	-1.00163	1.05945e-10	1.00878e-09
C2orf71	-1.00166	2.30254e-08	1.38995e-07
CRHBP	-1.00221	1.1436e-07	6.07429e-07
MUC22	-1.00272	0.000588892	0.00153779
PDGFD	-1.00318	1.69679e-12	2.26531e-11
IL25	-1.00327	6.31944e-05	0.000201783
LOC400940	-1.00364	0.000615111	0.00160057
C19orf57	-1.00384	2.08291e-13	3.31287e-12
TMEM52	-1.00395	6.96207e-11	6.87335e-10
UBL4B	-1.00402	3.61314e-08	2.10575e-07
C4orf51	-1.00452	0.000915321	0.00229441
GAB4	-1.00491	0.000741614	0.00189595
LINC00472	-1.00501	1.07656e-09	8.3943e-09
SYNE1	-1.00528	3.0903e-15	6.76775e-14
AMIGO1	-1.00538	3.75687e-14	6.90248e-13
SLC8A3	-1.00552	6.27885e-06	2.41403e-05
OR52N4	-1.00554	4.73364e-06	1.85917e-05
LOC286083	-1.00567	0.000325893	0.000898395
DCDC2	-1.0062	2.017e-07	1.02201e-06
DKKL1	-1.00634	4.10417e-08	2.36709e-07
MZB1	-1.00635	5.70932e-06	2.21074e-05
PRKD1	-1.00647	2.45734e-12	3.18727e-11
OR1Q1	-1.00653	0.000534331	0.00140953
KIAA1244	-1.0067	1.32728e-07	6.94464e-07
FOXI1	-1.00677	0.00235815	0.00540879
CACNB2	-1.00682	1.03568e-26	1.59023e-24
NECAB1	-1.00752	3.53283e-09	2.46594e-08
WEE2	-1.00829	3.52283e-11	3.68749e-10
PIWIL2	-1.00833	0.000140991	0.000418453
ANKRD24	-1.00837	1.56133e-15	3.6139e-14
OR56B4	-1.0085	4.37193e-05	0.000143687
LHX2	-1.00855	4.33475e-07	2.07354e-06
LOC285847	-1.00872	5.91269e-08	3.29744e-07
NXPH1	-1.00873	0.000417158	0.0011256
KCNJ16	-1.00881	0.000599088	0.00156209
MFAP4	-1.00911	3.91499e-08	2.26659e-07
EFCAB4A	-1.00963	2.43225e-12	3.16013e-11
BEND7	-1.00966	8.94539e-10	7.07923e-09
RSPO1	-1.01041	1.18131e-08	7.54076e-08
C6orf97	-1.01076	4.68254e-14	8.3976e-13
KCNMB2	-1.01086	1.58564e-09	1.1919e-08
ZMYND12	-1.01122	6.00506e-17	1.83832e-15
OR8S1	-1.01123	0.000862122	0.00217498
KCNH3	-1.01146	1.70099e-09	1.26934e-08
GLT1D1	-1.01222	5.17655e-12	6.32178e-11
LOC646851	-1.01292	3.38538e-15	7.37145e-14
ZNF37BP	-1.01305	1.6733e-31	5.44445e-29
CNR2	-1.01331	6.37442e-06	2.44747e-05
SLC17A2	-1.01363	0.000775398	0.00197478
CHGB	-1.01434	0.00117297	0.00286924
KNCN	-1.01476	0.00052052	0.00137645
DTHD1	-1.01515	6.00559e-09	4.04684e-08
ZDHHC2	-1.01522	2.38077e-10	2.10009e-09
NRTN	-1.01551	3.54358e-09	2.47269e-08
FBP1	-1.01587	1.99617e-07	1.01326e-06
LOC158435	-1.0165	0.000286532	0.000798489
LEFTY2	-1.01653	2.8808e-07	1.42328e-06
LOC340544	-1.01659	1.68517e-17	5.60312e-16
APOD	-1.01687	1.16493e-07	6.17034e-07
KLK15	-1.01794	6.12331e-05	0.000196042
HGF	-1.01867	2.22479e-09	1.61684e-08
MYOCD	-1.01911	8.41566e-09	5.50158e-08
LOC401177	-1.02011	9.52219e-06	3.53854e-05
MIR3671	-1.02027	6.75842e-08	3.72892e-07
LOC100505783	-1.02029	8.37368e-22	5.62593e-20
MC2R	-1.0208	0.00215898	0.00499675
VWA2	-1.02083	2.61712e-09	1.87268e-08
FLJ45079	-1.02111	1.55119e-06	6.64847e-06
LOC650368	-1.02151	3.3775e-15	7.36133e-14
DMGDH	-1.02167	1.07412e-11	1.23121e-10
TM7SF4	-1.02175	1.63069e-05	5.81686e-05
PIEZO2	-1.02199	3.80786e-11	3.94577e-10
MB	-1.02209	0.000578591	0.00151419
SPINLW1	-1.02214	0.0181576	0.0338149
LOC338963	-1.02217	0.000122768	0.000368693
BFSP2	-1.02218	6.4763e-08	3.58804e-07
PARD6A	-1.0225	3.709e-16	9.77733e-15
DMD	-1.02254	4.95821e-12	6.07891e-11
LOC100128788	-1.02269	1.81275e-13	2.92195e-12
SLC25A21	-1.02277	7.27685e-11	7.15311e-10
THRSP	-1.02282	3.40028e-05	0.000114107
PRR15	-1.02323	9.63359e-08	5.18466e-07
LRRC30	-1.02349	0.00543699	0.0114565
LOC338799	-1.02353	8.81601e-20	4.31924e-18
NKX2-2	-1.02364	0.00518473	0.0109716
KCNK12	-1.02386	1.40667e-07	7.32472e-07
FAM182A	-1.02402	2.7981e-06	1.14932e-05
UNC45B	-1.02408	0.000695108	0.00178587
CCDC27	-1.02445	1.12193e-07	5.96336e-07
LINC00483	-1.0246	0.000100129	0.000306482
VWA5B2	-1.02502	4.33965e-09	2.98971e-08
LOC389634	-1.02523	9.49839e-10	7.48306e-09
TMEM179	-1.02536	0.00558962	0.0117466
ID4	-1.02542	1.60399e-15	3.69762e-14
KRT7	-1.02617	1.91884e-05	6.74124e-05
CXorf30	-1.0262	0.00104814	0.00259314
TEKT5	-1.02647	2.64452e-10	2.31127e-09
TSPAN32	-1.02682	6.33091e-12	7.5851e-11
C9orf173	-1.02726	1.33287e-07	6.96934e-07
FRMPD2	-1.02824	3.05241e-05	0.000103301
EFHC2	-1.02831	1.40078e-08	8.8036e-08
AMELY	-1.0289	0.0274654	0.0489515
EVX1	-1.02953	2.06654e-05	7.22893e-05
RAB39B	-1.02957	8.81824e-11	8.56114e-10
FAM110B	-1.02958	2.72011e-14	5.12009e-13
KCTD19	-1.02976	6.98823e-10	5.65213e-09
LOC221442	-1.02979	9.74698e-13	1.36951e-11
FAM75D5	-1.02991	0.000816145	0.00206861
FLJ38576	-1.03004	4.26911e-14	7.73534e-13
RLN2	-1.03006	2.95334e-07	1.4569e-06
PGPEP1	-1.03006	1.62117e-25	1.99588e-23
NT5M	-1.03019	3.76477e-11	3.90644e-10
MAMDC4	-1.03074	5.1003e-12	6.24205e-11
EFHD1	-1.03078	9.23988e-15	1.90106e-13
PRODH	-1.03093	4.17376e-11	4.30727e-10
COL21A1	-1.03104	5.86762e-06	2.26741e-05
PCDH11X	-1.03108	9.27666e-05	0.000286683
TTC40	-1.03123	3.34247e-07	1.63015e-06
CD300LG	-1.03135	2.26858e-08	1.37162e-07
LINC00202	-1.03187	1.12013e-06	4.95242e-06
TRIM50	-1.03225	1.04573e-09	8.16789e-09
SLC36A2	-1.03236	9.46242e-05	0.000291474
LURAP1	-1.03242	1.49422e-13	2.44485e-12
PCDHA9	-1.03252	7.96858e-07	3.63712e-06
RSPH4A	-1.03278	8.93916e-13	1.2638e-11
ADH6	-1.03289	6.5456e-16	1.6455e-14
ART5	-1.03297	9.47099e-07	4.25634e-06
IGLL1	-1.03302	2.08229e-05	7.28291e-05
LOC285768	-1.03331	2.0145e-09	1.47721e-08
JAK3	-1.03335	1.30562e-19	6.24723e-18
SCGB3A2	-1.03349	0.000713814	0.0018296
LOC653786	-1.03351	1.65564e-10	1.50836e-09
SPATA6	-1.03393	7.05205e-20	3.54564e-18
TEKT1	-1.03397	0.00104809	0.00259314
KLRG1	-1.03407	1.01005e-13	1.69653e-12
ZFP3	-1.03442	1.68107e-17	5.59767e-16
LOC729970	-1.03545	1.77091e-14	3.45919e-13
C2orf77	-1.03553	2.78118e-14	5.22641e-13
WBSCR27	-1.03603	1.37131e-09	1.04598e-08
ANGPTL5	-1.03609	0.000408222	0.00110384
GRM1	-1.03621	6.89038e-07	3.18262e-06
C20orf26	-1.03644	1.01917e-10	9.76144e-10
NOXO1	-1.0368	4.28918e-15	9.2335e-14
GFRA1	-1.03714	9.61643e-08	5.17736e-07
MMP21	-1.03718	2.56539e-10	2.24815e-09
UCMA	-1.03736	0.0148699	0.0282679
IGSF9B	-1.03761	7.17209e-09	4.76104e-08
MEF2B	-1.03776	6.67455e-06	2.55581e-05
MPP2	-1.03778	2.52297e-11	2.72466e-10
TFR2	-1.03789	2.32542e-11	2.52328e-10
LOC648691	-1.03831	0.000401106	0.00108589
EPHX3	-1.03855	4.70376e-06	1.84901e-05
SH3BP5	-1.03882	3.85245e-17	1.21193e-15
HES3	-1.03889	0.00130862	0.00316806
SERTM1	-1.0389	0.00172611	0.0040782
BIRC3	-1.03944	1.08632e-09	8.46459e-09
LOC285484	-1.03944	2.26388e-08	1.36915e-07
THPO	-1.0395	1.62553e-11	1.80865e-10
SPZ1	-1.03984	0.00942785	0.0187979
DPY19L2	-1.04002	6.49802e-13	9.44473e-12
SLC25A48	-1.04035	6.99569e-06	2.67159e-05
ACPL2	-1.04072	7.0452e-15	1.47348e-13
C7orf58	-1.04128	9.2028e-11	8.90412e-10
GLRB	-1.04182	2.29874e-10	2.03721e-09
LOC201617	-1.04202	6.44066e-05	0.000205365
LOC643669	-1.04211	1.09312e-07	5.82385e-07
SLC12A1	-1.04235	2.68743e-07	1.33498e-06
SPAG11B	-1.04264	0.00672295	0.0138962
LOC151171	-1.04266	4.17087e-06	1.6596e-05
NLRP14	-1.04267	6.30627e-09	4.22506e-08
ADAMTS17	-1.04329	5.26802e-17	1.62141e-15
MIR130B	-1.04333	3.39723e-05	0.000114022
H2BFXP	-1.04388	2.02519e-08	1.23794e-07
HNF4G	-1.0439	7.47722e-06	2.83599e-05
LOC100505967	-1.04401	4.88866e-05	0.000159382
GOLGA2P5	-1.04515	2.47335e-19	1.14498e-17
OCM	-1.04544	8.32844e-08	4.52762e-07
PCDH20	-1.04556	7.06491e-05	0.000223642
ESR1	-1.04566	1.85795e-09	1.3766e-08
PDZRN4	-1.0458	1.0135e-06	4.52661e-06
CLRN1	-1.04585	0.000976563	0.00243137
MOGAT3	-1.0459	0.000528143	0.00139499
C9orf4	-1.04601	0.000948592	0.00236769
CADM1	-1.04614	2.7478e-12	3.52784e-11
TRDN	-1.04636	0.00307026	0.00686043
C6orf222	-1.0465	6.51448e-08	3.60831e-07
BRSK2	-1.04736	2.11724e-08	1.28868e-07
LINC00272	-1.04756	0.000249923	0.000705009
GUCY2GP	-1.04825	3.11348e-05	0.000105196
SUSD4	-1.04827	2.09398e-09	1.53057e-08
PLEKHG7	-1.04849	7.73464e-07	3.53672e-06
IRX6	-1.04876	0.000170487	0.00049674
MUC5B	-1.04915	0.00448696	0.0096474
CST9L	-1.04922	0.00331232	0.0073458
AGMO	-1.04923	3.60256e-06	1.45173e-05
L3MBTL4	-1.04947	6.44566e-09	4.31402e-08
LOC100505746	-1.05002	8.66348e-13	1.22864e-11
TMEM170B	-1.05031	7.04148e-20	3.54564e-18
LOC144571	-1.05092	2.81639e-24	2.78896e-22
RSPH6A	-1.05129	1.88405e-06	7.94913e-06
ITPKA	-1.05146	9.81488e-14	1.65465e-12
OR2B6	-1.05192	5.10533e-07	2.41043e-06
ZNF711	-1.05207	3.55284e-11	3.71199e-10
PRDM13	-1.05256	6.6754e-05	0.000212078
C4orf39	-1.05313	5.48863e-08	3.07677e-07
SPATA4	-1.05343	2.13629e-05	7.4523e-05
ARHGAP4	-1.05347	3.22862e-14	5.9882e-13
LOC401109	-1.0536	6.63672e-10	5.39464e-09
RNF207	-1.0536	1.09614e-16	3.16824e-15
ACHE	-1.05362	2.97319e-08	1.76118e-07
CBS	-1.05365	1.65341e-09	1.23916e-08
GABRB3	-1.05371	0.000164063	0.000479679
ZNF238	-1.05386	4.56579e-27	7.54348e-25
C18orf34	-1.05393	7.09946e-10	5.73395e-09
C8orf77	-1.05412	1.13136e-15	2.69821e-14
LHFPL4	-1.05457	0.00107279	0.0026478
DEFB118	-1.05458	0.00957658	0.0190661
ACSS3	-1.05468	8.91548e-11	8.64817e-10
LOC100131825	-1.05472	3.5232e-07	1.71206e-06
SVOPL	-1.055	6.91767e-08	3.80848e-07
SLC26A9	-1.05513	1.44212e-06	6.21962e-06
GCHFR	-1.0552	1.15455e-15	2.75063e-14
MIR4324	-1.05522	2.01262e-05	7.05658e-05
MMP27	-1.05585	2.06803e-06	8.67271e-06
RUFY4	-1.05601	1.65673e-09	1.24124e-08
SMTNL1	-1.05644	2.07366e-06	8.68992e-06
GPC5	-1.05645	9.16769e-07	4.13308e-06
SGCA	-1.05701	4.46193e-05	0.000146349
SPOCK2	-1.05707	2.42096e-12	3.14725e-11
B4GALNT4	-1.05741	2.83809e-07	1.404e-06
OTX2	-1.05745	0.00580071	0.0121476
CRYBA4	-1.05748	5.1935e-07	2.448e-06
MIAT	-1.05802	1.40017e-11	1.57405e-10
PIWIL4	-1.05816	1.29097e-15	3.03125e-14
PLCL2	-1.0583	8.9569e-19	3.7024e-17
PCLO	-1.05841	3.11256e-07	1.52784e-06
C3orf30	-1.05851	0.00150156	0.00359125
XK	-1.05853	9.05183e-10	7.15849e-09
KIRREL2	-1.05858	4.80506e-06	1.88527e-05
AFF2	-1.05865	1.48903e-06	6.40254e-06
SOBP	-1.0589	9.38337e-16	2.29309e-14
NEB	-1.05892	0.000181383	0.00052546
LOC100499484	-1.0591	7.26875e-12	8.59123e-11
DPY19L2P2	-1.05924	1.77938e-13	2.87224e-12
IGSF10	-1.05925	2.43139e-06	1.00869e-05
AKAP14	-1.05927	2.46119e-08	1.47555e-07
LOC400238	-1.05953	0.00046636	0.00124596
CNTNAP5	-1.05977	7.40819e-05	0.00023359
ACSM3	-1.05996	3.27695e-19	1.47984e-17
RAB37	-1.06054	4.25316e-17	1.32881e-15
RNF212	-1.06073	2.82546e-05	9.61204e-05
GPLD1	-1.06083	2.14342e-08	1.30391e-07
RBM11	-1.06087	1.61e-06	6.87595e-06
DCHS2	-1.06093	1.68254e-07	8.67201e-07
LOC283688	-1.0612	0.000372593	0.00101485
ZBTB7C	-1.06173	2.01524e-09	1.47721e-08
MIR600HG	-1.06198	8.33321e-16	2.04965e-14
LIPI	-1.0622	1.17697e-07	6.22833e-07
TTC36	-1.0629	3.00295e-10	2.59171e-09
C11orf9	-1.06291	1.21083e-10	1.13911e-09
LOC100134317	-1.06303	9.94883e-09	6.41729e-08
GABRG2	-1.06306	0.0145666	0.0277631
DCDC5	-1.0635	4.70633e-06	1.8494e-05
AGAP7	-1.06462	3.57184e-11	3.72833e-10
TTLL10	-1.065	3.35072e-13	5.13913e-12
PON1	-1.06505	0.00109688	0.00269961
CCDC105	-1.06584	0.00273819	0.00619068
RGS9	-1.06599	1.61222e-15	3.71284e-14
C5	-1.06607	2.4874e-17	8.01315e-16
TACR2	-1.06611	1.09396e-17	3.74677e-16
AZGP1	-1.06617	9.61989e-05	0.000295845
KBTBD13	-1.06637	6.74529e-05	0.00021406
LRFN2	-1.06642	1.72932e-09	1.28842e-08
ZPBP	-1.06662	0.00606378	0.0126577
RAB26	-1.06669	3.10679e-11	3.28964e-10
TMSB4Y	-1.06735	2.84675e-11	3.04688e-10
LOC283547	-1.06748	9.23187e-09	5.98705e-08
GALNTL5	-1.06895	0.00216324	0.00500507
FBXW12	-1.06961	0.000128398	0.000384082
DNAJC5G	-1.07023	7.41994e-05	0.000233841
ANKRD20A11P	-1.07029	2.25805e-06	9.42447e-06
FAM179A	-1.0704	3.69653e-13	5.65048e-12
C10orf81	-1.07048	9.36011e-05	0.000288713
CBLN1	-1.07048	1.56158e-06	6.69171e-06
SAP25	-1.07071	2.92265e-08	1.7335e-07
LOC100129148	-1.07082	2.12817e-10	1.90009e-09
IGJ	-1.07105	3.71842e-06	1.49314e-05
COL6A4P2	-1.07165	3.8901e-09	2.70042e-08
SDPR	-1.0718	1.42833e-12	1.93986e-11
B7H6	-1.07188	4.91328e-11	4.99102e-10
NOTUM	-1.07196	4.29605e-10	3.6253e-09
CLEC2L	-1.07199	0.000671307	0.00173235
KRTAP5-7	-1.07208	1.67826e-05	5.96878e-05
IGLL3P	-1.07229	2.02931e-06	8.51981e-06
RAD9B	-1.07295	8.59143e-21	4.9791e-19
BDAG1	-1.07302	4.5754e-07	2.1792e-06
TNFRSF19	-1.0731	1.93309e-14	3.75346e-13
SNED1	-1.0731	7.29212e-14	1.26301e-12
TSPEAR	-1.07322	8.61647e-06	3.22671e-05
C2orf15	-1.07343	1.15718e-19	5.60766e-18
TMC2	-1.07406	1.65955e-10	1.51071e-09
TCEA3	-1.07407	1.68988e-15	3.8682e-14
ITGA2B	-1.07416	6.29101e-16	1.585e-14
EGOT	-1.07468	8.00204e-11	7.8288e-10
RIIAD1	-1.07485	2.70473e-05	9.22615e-05
CDH19	-1.07516	7.62982e-05	0.000240023
C3orf27	-1.07523	8.4935e-05	0.000264635
TTTY10	-1.0758	7.08708e-05	0.00022425
VPREB1	-1.07594	0.000328719	0.000905746
CHRNA6	-1.07601	7.0695e-09	4.69811e-08
PCDH11Y	-1.07705	4.19567e-05	0.000138293
UGT1A9	-1.07729	0.0071899	0.0147529
ATP6V0E2	-1.07738	1.76558e-14	3.45174e-13
PALM	-1.07748	9.47527e-12	1.09659e-10
FUZ	-1.07756	4.20073e-22	3.02771e-20
KCNA5	-1.07812	1.26616e-09	9.71957e-09
LOC100506779	-1.0782	6.75976e-21	3.9376e-19
C11orf85	-1.07841	0.00250172	0.00570818
CXorf65	-1.07851	1.18303e-09	9.14002e-09
LOC100505483	-1.07854	1.16611e-09	9.03075e-09
RAI2	-1.07865	4.04018e-15	8.74707e-14
SPDYC	-1.07908	0.00253536	0.00577568
CKMT2	-1.07936	2.35371e-05	8.12245e-05
LOC643770	-1.07946	1.6423e-16	4.57833e-15
MFI2-AS1	-1.07978	4.28059e-14	7.74382e-13
FLJ43860	-1.07993	2.48339e-09	1.78519e-08
HSD3BP4	-1.07995	9.40606e-09	6.09654e-08
KLHDC7A	-1.08015	2.41141e-06	1.00132e-05
P4HTM	-1.08024	3.96995e-25	4.58983e-23
SYCE1	-1.08025	2.45286e-08	1.47146e-07
HNF1A-AS1	-1.08099	1.011e-05	3.74049e-05
CILP	-1.08107	8.23854e-06	3.09961e-05
CCDC135	-1.08129	8.56295e-07	3.88738e-06
RUNX1T1	-1.08146	9.07423e-14	1.54465e-12
CYP2A7	-1.0824	0.000627674	0.00162991
LINC00327	-1.08279	1.03596e-14	2.12185e-13
HAAO	-1.08345	2.03456e-15	4.56544e-14
MGC4473	-1.08416	0.00047764	0.00127376
HPCA	-1.08446	1.30081e-14	2.61033e-13
PROX1	-1.0847	1.51195e-09	1.14254e-08
PRND	-1.08514	1.50508e-07	7.80681e-07
SNX22	-1.08524	9.1828e-17	2.70916e-15
NDP	-1.08546	3.3394e-07	1.629e-06
TRAT1	-1.08647	9.56581e-08	5.15183e-07
NLRP13	-1.08671	0.000618907	0.00160953
AKR7A3	-1.08672	2.52809e-11	2.7289e-10
FCRL4	-1.08702	3.71376e-05	0.000123806
RARB	-1.08762	7.50844e-11	7.37439e-10
FAM215A	-1.08802	1.23603e-07	6.51212e-07
ABHD1	-1.0882	3.0906e-13	4.77878e-12
CHRNA7	-1.08889	3.29552e-10	2.82707e-09
PROP1	-1.08906	6.52971e-05	0.000207885
PVALB	-1.08912	3.05249e-06	1.24572e-05
LRRC37A4	-1.08989	1.36566e-18	5.46648e-17
WISP2	-1.09017	1.21367e-06	5.32099e-06
PSCA	-1.09089	5.02767e-06	1.96719e-05
KCNH6	-1.09098	9.43109e-09	6.11103e-08
FGF9	-1.091	5.31723e-08	2.99025e-07
LOC100506795	-1.09123	1.61689e-08	1.00449e-07
SLIT1	-1.09233	1.01322e-10	9.70846e-10
MEX3A	-1.09237	3.75395e-15	8.15063e-14
ZNF280A	-1.09275	0.00303279	0.00679203
KLHL14	-1.09317	1.13643e-08	7.26859e-08
LOC284576	-1.09345	3.39442e-08	1.98897e-07
ABCA13	-1.09347	1.2543e-07	6.60228e-07
TMSB15B	-1.09355	4.43157e-11	4.5445e-10
RIMKLA	-1.09363	8.7954e-07	3.98496e-06
KCNQ3	-1.09376	6.2712e-15	1.31886e-13
ADH4	-1.09377	8.02486e-12	9.38266e-11
AQP7	-1.09406	3.03609e-08	1.79377e-07
RBP7	-1.09408	2.5152e-10	2.20841e-09
PIPOX	-1.09498	2.67126e-10	2.33285e-09
FLJ46284	-1.09503	0.00585227	0.0122454
PDE5A	-1.09537	2.4259e-22	1.8541e-20
MIR29C	-1.09549	1.69189e-10	1.53644e-09
PACSIN1	-1.09632	1.19813e-10	1.12903e-09
ATP2B3	-1.09656	9.92985e-06	3.67923e-05
LOC100506474	-1.09665	6.52303e-10	5.31379e-09
ZNF334	-1.09676	2.72981e-09	1.94781e-08
NR1I2	-1.09717	3.19188e-10	2.74436e-09
RFPL3-AS1	-1.09792	8.09325e-10	6.46551e-09
MC5R	-1.09796	3.10838e-05	0.000105055
IGLL5	-1.09801	5.13569e-06	2.00567e-05
ANKRD65	-1.09855	1.45156e-15	3.38893e-14
C8orf12	-1.09944	0.00199582	0.00465126
MTTP	-1.09949	1.14012e-09	8.8505e-09
SP7	-1.09951	1.36404e-08	8.61068e-08
CACNA2D2	-1.09955	1.00812e-22	8.22977e-21
TMEM132B	-1.10003	3.61515e-12	4.53657e-11
PRSS36	-1.10081	2.47558e-21	1.57058e-19
ASB9P1	-1.1015	1.47423e-15	3.43674e-14
ZSWIM2	-1.1017	0.000457134	0.00122289
HEATR8-TTC4	-1.10188	1.70968e-08	1.05699e-07
SLC12A5	-1.10292	1.22482e-12	1.68457e-11
CELF6	-1.10324	2.28412e-15	5.07542e-14
CELA3B	-1.10351	0.00197746	0.00461321
ASB16	-1.10415	6.6882e-19	2.82617e-17
CCDC28B	-1.10431	1.15502e-17	3.94404e-16
FAM107A	-1.10437	4.93209e-13	7.36128e-12
NR1H4	-1.10439	6.97323e-06	2.66391e-05
C1orf127	-1.10481	3.33171e-13	5.11341e-12
PRAMEF2	-1.10485	0.00468134	0.0100209
SLIT2	-1.10541	1.62129e-09	1.21629e-08
KIAA0125	-1.10549	3.91456e-07	1.88694e-06
MAFA	-1.10581	1.15462e-08	7.38077e-08
GSTA7P	-1.10582	0.000473457	0.00126388
FAM47E	-1.10598	2.68611e-17	8.60461e-16
CYP1B1-AS1	-1.10698	1.26003e-09	9.68232e-09
SLFN13	-1.10707	1.56525e-13	2.55374e-12
CLVS2	-1.10709	7.15352e-05	0.000226101
ASB18	-1.10732	1.31868e-05	4.77417e-05
CYP17A1	-1.10774	6.52146e-16	1.64125e-14
HS3ST2	-1.10779	3.28626e-08	1.92907e-07
GALNT5	-1.10851	2.22599e-08	1.34767e-07
MRPL23-AS1	-1.10856	1.60053e-06	6.84064e-06
CBLN4	-1.10918	2.89175e-05	9.82289e-05
FLJ32063	-1.10958	2.00665e-05	7.0378e-05
HGD	-1.10958	2.7931e-08	1.66185e-07
CBX7	-1.11147	1.20782e-26	1.77479e-24
CD40LG	-1.11167	1.32257e-09	1.01117e-08
PEBP4	-1.11178	2.29257e-05	7.9331e-05
LOC440356	-1.11199	1.88182e-06	7.94153e-06
TFF2	-1.11206	0.0149257	0.0283644
PPP1R14D	-1.11226	7.74215e-07	3.53874e-06
SLC17A1	-1.11313	0.0157461	0.0297645
CCR10	-1.1134	5.03281e-11	5.09455e-10
LOC388942	-1.11363	0.000713723	0.00182957
PROX1-AS1	-1.11376	1.31428e-07	6.88457e-07
LYPD6	-1.11383	1.93888e-08	1.18837e-07
PIP	-1.11414	0.0105041	0.0206814
C1QTNF3	-1.11418	1.14192e-09	8.86143e-09
TNFRSF17	-1.11471	8.89385e-07	4.02397e-06
TDGF1	-1.11477	7.26152e-08	3.98526e-07
OOEP	-1.11495	0.000101343	0.000309896
REG1A	-1.11501	0.0088735	0.0177939
HSPC072	-1.11508	3.22136e-08	1.89537e-07
LINC00176	-1.11513	1.25125e-14	2.52198e-13
TTC25	-1.11538	7.92498e-18	2.76839e-16
LOC572558	-1.11574	0.000187518	0.000541925
MYO15B	-1.11581	3.64643e-19	1.61893e-17
TTLL6	-1.11623	9.84355e-08	5.28891e-07
C4BPB	-1.11697	2.39639e-06	9.96171e-06
TCEB3B	-1.11701	8.02846e-06	3.02943e-05
LRRC2	-1.11712	5.16689e-06	2.0175e-05
GATS	-1.11769	1.08495e-23	9.84493e-22
LOC283194	-1.11775	7.7427e-06	2.92839e-05
IL2RG	-1.11804	1.8812e-14	3.65894e-13
TNNT3	-1.11817	0.000146906	0.000433693
SOX5	-1.11894	1.57858e-08	9.83417e-08
CHRFAM7A	-1.11911	5.41932e-13	8.02538e-12
DMBT1	-1.11928	0.00182798	0.00429705
LINC00475	-1.11953	2.27272e-10	2.01649e-09
PRR23B	-1.12013	0.00205456	0.00477545
TF	-1.12043	2.3765e-05	8.19117e-05
IHH	-1.1205	1.14035e-11	1.30319e-10
GPR143	-1.12095	6.76194e-11	6.68736e-10
MDS2	-1.1213	6.68354e-11	6.61557e-10
CXorf22	-1.12157	0.000430663	0.00115847
MIR149	-1.12157	0.000541691	0.00142614
HYDIN	-1.12178	1.64172e-10	1.49687e-09
SLCO5A1	-1.12274	3.27269e-11	3.45247e-10
GALR3	-1.12331	2.63382e-09	1.88286e-08
SULT1E1	-1.12333	4.1924e-05	0.000138205
HAND1	-1.12373	0.000492019	0.00130761
ASB9	-1.12374	4.32567e-16	1.11956e-14
GPR133	-1.12382	3.88547e-12	4.85439e-11
UOX	-1.12387	5.37163e-06	2.09135e-05
FLJ12334	-1.12388	1.24156e-12	1.70554e-11
BPIFB6	-1.12388	6.11549e-06	2.356e-05
ZDHHC11	-1.12394	5.98569e-10	4.91103e-09
LINC00461	-1.12443	7.13266e-06	2.71832e-05
LINC00323	-1.12552	7.10764e-12	8.40953e-11
EPHA10	-1.12617	1.68201e-10	1.52932e-09
IL1R2	-1.12629	1.40151e-08	8.80577e-08
GIPC2	-1.12644	1.00488e-07	5.38823e-07
PURG	-1.12674	1.50352e-12	2.0311e-11
LOC728175	-1.12681	5.53166e-15	1.17199e-13
AQP4	-1.12697	0.000251629	0.000709295
MAPT	-1.1279	2.97733e-09	2.1053e-08
DPEP3	-1.1287	2.93655e-10	2.54308e-09
LOC100271832	-1.12894	3.6867e-06	1.48144e-05
HCRTR2	-1.12924	7.19926e-07	3.31186e-06
GNG7	-1.12961	1.19979e-18	4.86234e-17
PTN	-1.12977	3.37656e-08	1.98004e-07
C9orf71	-1.13005	2.22165e-07	1.12071e-06
CXorf64	-1.13025	0.00127578	0.00309481
LOC151174	-1.13037	4.00554e-13	6.07796e-12
PLCXD3	-1.13042	6.64103e-07	3.07494e-06
C15orf56	-1.13064	4.80482e-10	4.01448e-09
AGXT2L1	-1.13085	0.000104033	0.000317325
CUX2	-1.13099	1.8867e-08	1.1592e-07
GPR15	-1.13125	1.39744e-06	6.04866e-06
CPA1	-1.13127	2.272e-05	7.86908e-05
CCDC154	-1.13144	6.14382e-09	4.12777e-08
PCDP1	-1.13285	3.28609e-07	1.60506e-06
COX6B2	-1.13294	1.21011e-10	1.1389e-09
LPL	-1.13297	2.21343e-11	2.41211e-10
CCDC146	-1.13305	3.63017e-21	2.19312e-19
ABCC8	-1.13476	4.82296e-07	2.28659e-06
SEMG1	-1.13518	0.00395124	0.00861676
USP44	-1.13566	1.03417e-10	9.88846e-10
OLIG3	-1.1357	0.000208071	0.000595206
CCDC129	-1.13595	6.90585e-05	0.00021882
STAR	-1.13595	1.87045e-10	1.68651e-09
FGF14	-1.13621	2.73699e-10	2.38659e-09
SERPINA11	-1.13643	1.00955e-05	3.73697e-05
FOXG1	-1.13648	0.000301687	0.000836525
NR2F1	-1.13661	8.27347e-18	2.88571e-16
LIFR	-1.13672	6.12183e-13	8.96661e-12
LOC100288122	-1.13703	8.87517e-07	4.01871e-06
C21orf37	-1.13723	3.69306e-06	1.48374e-05
CA4	-1.13781	9.27745e-07	4.17678e-06
JPH3	-1.13993	4.98546e-08	2.81899e-07
SLC1A7	-1.14006	6.03976e-09	4.06386e-08
MSX2P1	-1.1407	2.73956e-09	1.95293e-08
GBA3	-1.14107	3.4208e-05	0.000114762
LOC399815	-1.14111	2.48622e-14	4.73068e-13
STAP1	-1.14111	1.48951e-10	1.37348e-09
FBXO40	-1.14147	0.000167101	0.00048781
FDCSP	-1.14181	0.00225259	0.00519195
LRTM1	-1.14198	9.56774e-06	3.55373e-05
SLC18A1	-1.14286	1.11547e-08	7.14856e-08
CYP1A1	-1.14312	0.000352202	0.000964106
DNTT	-1.14336	4.45012e-05	0.000145983
SAMD7	-1.14385	0.000153958	0.000452807
PROCA1	-1.14403	1.2332e-26	1.80047e-24
TTBK1	-1.14413	2.63105e-18	1.00377e-16
COX6A2	-1.14494	0.00189679	0.0044432
DNAJC5B	-1.14622	2.26607e-09	1.6437e-08
TEDDM1	-1.14677	7.39826e-10	5.95416e-09
ST6GALNAC1	-1.14681	1.93784e-09	1.42697e-08
EFCAB6	-1.14796	2.33175e-18	8.95579e-17
DMRTB1	-1.14835	0.00011791	0.00035518
MORN3	-1.1487	1.0217e-10	9.7774e-10
C9orf171	-1.14879	1.04774e-08	6.73153e-08
B3GALT1	-1.14915	1.22867e-05	4.47605e-05
IL34	-1.14995	1.23968e-14	2.50533e-13
TMEM56	-1.15011	6.4182e-12	7.6816e-11
PTGDS	-1.15027	2.89726e-10	2.51383e-09
NLRP11	-1.15061	1.85123e-05	6.53091e-05
CACNG6	-1.15088	0.000151702	0.00044675
ZNF540	-1.1511	3.38805e-23	2.89012e-21
TNFRSF13C	-1.15133	4.70197e-14	8.41918e-13
VASH2	-1.15142	5.57066e-14	9.88141e-13
ATP1A2	-1.15151	5.63969e-05	0.000181992
GPT	-1.15158	4.52708e-14	8.14445e-13
GJA10	-1.15171	0.00317649	0.00707217
SPEF2	-1.15172	6.4515e-14	1.13117e-12
ERO1LB	-1.15237	1.16231e-23	1.04636e-21
ENO3	-1.15244	1.09441e-06	4.84948e-06
MIR3616	-1.15283	0.00820965	0.0166045
SPACA3	-1.15289	8.5693e-06	3.21116e-05
SELE	-1.15321	6.86246e-09	4.57632e-08
ITGB1BP3	-1.15323	0.00132787	0.0032109
METTL21CP1	-1.15331	5.13203e-09	3.49229e-08
PNOC	-1.15342	1.62564e-08	1.00876e-07
FATE1	-1.15357	7.69581e-10	6.17835e-09
FAM19A4	-1.15384	0.000107763	0.000327168
LGALS4	-1.15389	2.44107e-07	1.22059e-06
BANF2	-1.15391	0.00643974	0.0133629
NANOS2	-1.15405	0.00195096	0.00455839
NGB	-1.15462	0.00011943	0.000359425
HOXA-AS5	-1.15488	1.34483e-07	7.02683e-07
LY6G6F	-1.15549	5.25881e-10	4.3602e-09
C1QTNF7	-1.15549	3.1526e-12	4.00021e-11
HTRA4	-1.15555	5.89979e-11	5.89617e-10
C1orf88	-1.15607	6.69691e-12	7.97745e-11
UGT2B11	-1.15612	0.00544558	0.0114703
NBEA	-1.15613	7.13107e-14	1.23794e-12
MS4A1	-1.15629	7.12435e-06	2.71572e-05
H1FX-AS1	-1.15641	2.45659e-22	1.87128e-20
BHLHA15	-1.15645	1.52434e-09	1.15038e-08
NKAIN4	-1.15689	3.55372e-06	1.43386e-05
RS1	-1.15735	1.75899e-16	4.86788e-15
ANKLE1	-1.15749	4.90874e-12	6.03029e-11
WBSCR28	-1.15755	4.85867e-06	1.90466e-05
MYOZ3	-1.15822	4.32163e-06	1.7142e-05
FAM90A20	-1.15829	3.61211e-06	1.45506e-05
RGN	-1.15882	5.35763e-16	1.368e-14
LOC285548	-1.15898	1.68847e-12	2.25702e-11
FAM189A1	-1.159	9.79257e-09	6.32546e-08
ETV1	-1.15935	1.74634e-15	3.98143e-14
HMX3	-1.15961	1.46915e-05	5.27864e-05
ASPDH	-1.16009	8.68843e-16	2.13241e-14
ST6GAL2	-1.16039	3.47667e-07	1.69162e-06
C2CD4B	-1.16056	8.8313e-13	1.2501e-11
ALX4	-1.16067	4.44882e-07	2.1229e-06
ITGAM	-1.16092	1.65013e-15	3.79248e-14
DKFZp686K1684	-1.16093	0.000344688	0.000945743
SUSD5	-1.16098	1.16608e-10	1.10247e-09
SLC5A8	-1.16233	0.00279048	0.00629642
CACNG5	-1.16237	0.000157634	0.000462545
DPPA3	-1.16274	0.000265314	0.000744187
ITGAD	-1.16352	2.8874e-14	5.40818e-13
STAB2	-1.16434	4.2781e-12	5.30997e-11
C12orf74	-1.16491	6.44434e-07	2.98933e-06
CCDC158	-1.16503	8.67334e-14	1.48641e-12
TNN	-1.16524	2.40081e-09	1.73205e-08
ENPP5	-1.16533	1.75206e-07	9.00382e-07
CBY3	-1.16549	1.09705e-13	1.83455e-12
GHRL	-1.16581	6.85882e-18	2.42196e-16
LDHC	-1.1661	2.34701e-06	9.77248e-06
WDR38	-1.16612	2.02919e-09	1.48559e-08
IKZF3	-1.16613	5.58623e-09	3.77655e-08
MIR4521	-1.16656	0.00126304	0.00306846
DLG2	-1.16666	4.26755e-13	6.44547e-12
CHST9-AS1	-1.16678	9.098e-07	4.10573e-06
ACACB	-1.16704	8.9676e-24	8.26907e-22
ANKRD63	-1.16721	3.86558e-05	0.00012836
LOC100287814	-1.16723	3.06322e-07	1.50654e-06
LRP1B	-1.16734	3.30489e-07	1.61321e-06
LDB3	-1.16956	9.52999e-06	3.54087e-05
NCRNA00185	-1.16977	7.86345e-05	0.000246725
GHRHR	-1.17	0.000328596	0.000905518
PRR25	-1.17013	6.01992e-09	4.0529e-08
ATRNL1	-1.17023	4.24437e-07	2.03387e-06
PTCHD1	-1.17128	1.28853e-06	5.61246e-06
MRGPRX1	-1.172	0.00150879	0.00360703
FNDC5	-1.17328	2.52328e-10	2.21295e-09
ALPK3	-1.17352	6.29678e-12	7.55401e-11
CMAHP	-1.17362	3.33305e-21	2.04619e-19
LOC285878	-1.17366	0.0106006	0.0208442
PRM3	-1.17373	0.01947	0.0359796
SLC4A10	-1.17457	1.51728e-09	1.14619e-08
C3orf70	-1.17566	2.90892e-13	4.51319e-12
PLCH1	-1.17604	7.85706e-10	6.29449e-09
MECOM	-1.17607	2.01031e-15	4.53335e-14
ST18	-1.17617	2.89035e-13	4.49049e-12
SELV	-1.17629	4.40882e-05	0.000144753
FOXE3	-1.17638	3.46164e-09	2.41847e-08
SKAP1	-1.17682	1.15803e-14	2.34655e-13
RYR3	-1.17704	7.85016e-12	9.20202e-11
DNASE2B	-1.17732	6.40146e-05	0.000204173
NXF4	-1.17769	8.8337e-05	0.000274259
RBP4	-1.1778	2.26997e-05	7.86443e-05
ABCC6P1	-1.17912	1.98927e-09	1.46106e-08
MOXD1	-1.17946	9.02957e-11	8.75138e-10
CCL25	-1.17964	5.53911e-07	2.59639e-06
RNFT2	-1.18067	2.90779e-11	3.10201e-10
FCRL3	-1.18081	1.35708e-09	1.03617e-08
CPNE9	-1.18086	5.62006e-14	9.9458e-13
HMGCLL1	-1.18137	6.13582e-07	2.85728e-06
SPEF1	-1.18164	3.14318e-10	2.70658e-09
SLC6A16	-1.18207	1.45084e-17	4.88823e-16
FRZB	-1.18219	1.16649e-13	1.93785e-12
SCUBE3	-1.18221	1.86255e-06	7.86747e-06
SPTBN4	-1.18259	3.03737e-16	8.1101e-15
LOC283856	-1.18267	5.03874e-07	2.38146e-06
HSPB6	-1.18284	8.88144e-07	4.02075e-06
IGSF11-AS1	-1.18289	0.00171317	0.00405141
2020-09-03	-1.18318	9.68494e-12	1.11915e-10
LRRC46	-1.18429	2.66837e-22	2.02582e-20
SLC26A5	-1.18438	1.19268e-07	6.30558e-07
LINC00244	-1.18475	3.46444e-05	0.000116124
LOC100505933	-1.18519	5.67658e-16	1.43975e-14
PNMAL2	-1.18532	6.56417e-17	1.99607e-15
GPIHBP1	-1.18581	1.26488e-14	2.5472e-13
TSHR	-1.18626	1.06089e-10	1.00973e-09
LOC100131138	-1.18643	3.67551e-05	0.000122629
C17orf110	-1.1873	4.4861e-11	4.59215e-10
LINC00494	-1.18756	2.65622e-08	1.58746e-07
FAM70A	-1.18787	1.57892e-12	2.12412e-11
SLC27A5	-1.18842	3.72155e-16	9.79909e-15
VSX1	-1.18868	8.84314e-10	7.01049e-09
BK250D10.8	-1.18923	2.70414e-12	3.47571e-11
SEZ6	-1.18938	1.69847e-09	1.26793e-08
ANKS1B	-1.19044	6.98506e-16	1.75093e-14
ADCK3	-1.1906	3.77171e-22	2.75362e-20
TPTE2P6	-1.19081	3.43069e-10	2.93418e-09
SOX2	-1.19124	2.01579e-09	1.47721e-08
CCDC37	-1.19148	4.80982e-14	8.59877e-13
PVRL3-AS1	-1.1915	4.11505e-07	1.97481e-06
MYO18B	-1.1918	1.15303e-05	4.22208e-05
ULK4P3	-1.19231	2.57142e-12	3.32387e-11
VWC2	-1.19242	5.08042e-06	1.98613e-05
EFHA2	-1.19259	2.09878e-16	5.7385e-15
DAZL	-1.19276	1.95787e-07	9.9492e-07
PTH2R	-1.19281	0.000533403	0.00140741
FOLR1	-1.19286	8.09252e-06	3.05057e-05
TMEFF2	-1.19287	2.37266e-05	8.18286e-05
CALML6	-1.19455	2.94301e-08	1.74421e-07
LOC170425	-1.19463	0.000298535	0.000828492
PDCL2	-1.19487	8.21476e-06	3.09204e-05
KRT19	-1.19541	5.86997e-08	3.27442e-07
LOC100216479	-1.1957	3.64595e-06	1.46714e-05
SULT1C4	-1.19592	5.96621e-17	1.82889e-15
PGM5	-1.19611	1.23578e-12	1.69863e-11
LOC100130451	-1.19698	8.30991e-09	5.43557e-08
ANKRD36BP2	-1.19709	1.06324e-09	8.29331e-09
HOXB-AS3	-1.19785	2.00808e-07	1.01816e-06
NKX2-6	-1.19851	0.000284244	0.000792951
CA8	-1.19862	1.38289e-08	8.71275e-08
PRR18	-1.19879	9.78802e-09	6.32431e-08
DGKB	-1.19888	1.404e-08	8.81898e-08
HRC	-1.20005	1.23451e-05	4.49514e-05
SPO11	-1.20021	0.00531049	0.0112158
PCDHA3	-1.20103	1.81415e-08	1.11824e-07
ACADL	-1.20104	3.95835e-08	2.29111e-07
LCN10	-1.20175	5.46549e-13	8.08851e-12
C17orf64	-1.20178	4.76992e-08	2.70766e-07
AMY2B	-1.2023	4.81908e-16	1.23882e-14
RSPO2	-1.20242	1.34225e-05	4.85179e-05
JAKMIP2	-1.20264	1.56688e-08	9.76926e-08
ABI3BP	-1.20267	1.41349e-10	1.31457e-09
LRRC4B	-1.20269	1.72733e-15	3.946e-14
FGF13	-1.20298	1.79785e-09	1.33555e-08
LRRC4C	-1.203	1.95337e-10	1.75641e-09
CPSF4L	-1.20326	5.50605e-08	3.08577e-07
CGNL1	-1.20341	1.55156e-13	2.53321e-12
C1QTNF8	-1.20386	7.35562e-08	4.03011e-07
LINGO4	-1.20473	4.78983e-09	3.27509e-08
C19orf77	-1.20519	2.25118e-08	1.36219e-07
RERG	-1.20607	8.23125e-13	1.16953e-11
ATP1A4	-1.2066	5.04475e-14	8.99054e-13
LOC100507055	-1.20701	7.77859e-11	7.62001e-10
BCL2L15	-1.20724	8.98566e-10	7.10863e-09
FUT6	-1.20843	7.98883e-07	3.64491e-06
PTGIS	-1.20914	6.64427e-08	3.67216e-07
C8orf4	-1.20981	9.29594e-11	8.98279e-10
LHX3	-1.21088	7.60525e-06	2.87975e-05
TCF23	-1.21089	0.00108016	0.00266426
KAZALD1	-1.21111	8.21243e-20	4.06622e-18
MAP9	-1.21151	4.62021e-14	8.30543e-13
FOXD4L3	-1.2118	1.99823e-12	2.63683e-11
PON3	-1.21183	2.95286e-07	1.4569e-06
TPTE2	-1.21212	1.85495e-11	2.04197e-10
SULT2A1	-1.21256	0.00414537	0.00899361
WFIKKN1	-1.2131	2.23947e-13	3.5421e-12
LOC255480	-1.21319	0.00018902	0.000546059
KCNT2	-1.21381	1.29693e-14	2.60713e-13
LOC200772	-1.21382	1.43151e-06	6.17968e-06
CCDC78	-1.21388	1.97807e-13	3.15937e-12
NPM2	-1.21421	2.97222e-11	3.16186e-10
LOC145663	-1.21452	2.15054e-09	1.56738e-08
MIR146A	-1.21501	2.65576e-07	1.32068e-06
CLEC1A	-1.21547	5.33752e-22	3.7637e-20
CHRNA4	-1.21551	1.47971e-05	5.31074e-05
ZNF214	-1.2156	9.10746e-13	1.286e-11
LOC100192426	-1.21564	0.00291453	0.00655554
ILDR1	-1.21817	1.28411e-15	3.02137e-14
FGF2	-1.21834	1.07957e-13	1.80795e-12
NIPSNAP3B	-1.21858	1.0468e-22	8.51501e-21
TIGD3	-1.21869	6.472e-25	7.19055e-23
CRHR2	-1.21889	2.43428e-12	3.16095e-11
AMPD1	-1.21899	5.6058e-06	2.17472e-05
C11orf88	-1.21902	4.49437e-09	3.08696e-08
KSR2	-1.21911	1.25451e-12	1.72125e-11
H2BFM	-1.22018	0.000220185	0.000626867
RHO	-1.22051	4.60014e-08	2.62391e-07
CCDC151	-1.22072	4.49979e-13	6.75591e-12
HORMAD2	-1.22091	1.10877e-06	4.90735e-06
GPR12	-1.22154	3.87479e-06	1.55155e-05
PRELP	-1.2217	1.6971e-10	1.53997e-09
PDIA2	-1.22244	1.8617e-05	6.56378e-05
MSH4	-1.22245	1.17943e-10	1.11324e-09
LOC729683	-1.2233	4.46754e-20	2.32844e-18
CCDC114	-1.22336	7.80561e-13	1.11653e-11
ANKRD30A	-1.22344	4.11132e-07	1.97343e-06
ASXL3	-1.22365	3.03161e-11	3.21902e-10
ASCL1	-1.22384	2.01585e-07	1.02165e-06
TRIM54	-1.22401	5.73093e-05	0.000184622
PYGM	-1.22446	3.68308e-06	1.48025e-05
CLIP3	-1.22479	3.05849e-22	2.27648e-20
PKD2L1	-1.22485	1.51549e-14	2.98847e-13
IDAS	-1.22536	8.63534e-19	3.58249e-17
GREM2	-1.22543	4.52453e-10	3.79701e-09
AQP12A	-1.22575	6.03361e-05	0.000193551
TSPYL5	-1.22577	6.47155e-12	7.72921e-11
C22orf31	-1.226	5.69395e-13	8.38302e-12
NPB	-1.22604	1.6902e-11	1.87511e-10
PLEKHD1	-1.22621	7.48434e-13	1.07277e-11
MYOM1	-1.22667	1.87714e-07	9.58604e-07
VWDE	-1.22677	5.57325e-06	2.16393e-05
PPM1E	-1.22698	3.88678e-20	2.05395e-18
IQCJ	-1.22707	0.000140589	0.000417478
ANKRD20A5P	-1.22737	2.59774e-09	1.85999e-08
LINC00092	-1.22805	1.61262e-08	1.00243e-07
GPR83	-1.22812	8.14101e-15	1.68717e-13
SLC16A11	-1.22847	1.30646e-13	2.15e-12
PCP2	-1.22852	1.58303e-12	2.12714e-11
LHFPL1	-1.22926	4.21252e-07	2.01945e-06
LTK	-1.23007	2.59185e-13	4.06556e-12
RALGPS1	-1.23034	7.6034e-29	1.58876e-26
C17orf28	-1.23091	9.59973e-20	4.68187e-18
LOC100287846	-1.23156	1.03444e-08	6.65172e-08
CNIH2	-1.23188	2.97624e-16	7.96556e-15
C8orf86	-1.2323	0.000320286	0.000884331
VIPR2	-1.23321	1.54078e-12	2.0765e-11
LOC154860	-1.23331	8.46578e-06	3.17603e-05
PNMA6C	-1.23384	5.32551e-10	4.40748e-09
FAM55B	-1.23498	0.000203771	0.000583931
SLC6A3	-1.23514	1.26877e-08	8.05395e-08
SCML2	-1.23543	7.61014e-15	1.58366e-13
DKFZP434L187	-1.2357	2.76783e-05	9.42303e-05
ARHGAP26	-1.23628	5.39408e-27	8.7754e-25
ZNF705A	-1.23641	2.67631e-06	1.10347e-05
C14orf162	-1.23669	2.39031e-07	1.19757e-06
C3orf43	-1.23747	1.58532e-10	1.45242e-09
F11	-1.2384	9.99845e-06	3.70284e-05
MRGPRG	-1.23849	0.0130425	0.025121
MYT1	-1.2391	7.90406e-12	9.25092e-11
TCEAL2	-1.23919	2.35031e-09	1.6983e-08
SLC30A2	-1.23994	4.24454e-08	2.44064e-07
GABRG3	-1.24034	0.00399653	0.00870718
C12orf34	-1.24082	6.26465e-23	5.28458e-21
HPSE2	-1.24167	3.91674e-09	2.71809e-08
NTF3	-1.24167	2.36687e-10	2.08864e-09
FKBP6	-1.2418	1.6886e-12	2.25702e-11
SYNGR3	-1.24243	4.88496e-11	4.96696e-10
NSUN7	-1.24318	5.55012e-13	8.19776e-12
ECT2L	-1.2433	2.00754e-23	1.7586e-21
NR5A1	-1.24392	0.000393249	0.00106538
LOC100190938	-1.24402	5.97818e-13	8.76748e-12
AFF3	-1.2447	3.30623e-12	4.17189e-11
C11orf93	-1.24566	2.35189e-10	2.07865e-09
LOC100128946	-1.24585	5.67394e-07	2.65468e-06
COL11A2	-1.24639	5.92895e-20	3.03046e-18
FLJ13197	-1.24705	9.46258e-23	7.7805e-21
OR52N2	-1.24705	1.11661e-05	4.09963e-05
CDKN2C	-1.24736	7.68971e-20	3.84081e-18
PRKAR2B	-1.24783	6.29739e-20	3.20155e-18
MYCN	-1.2479	8.08991e-13	1.15304e-11
AK8	-1.24866	5.61442e-14	9.94355e-13
C12orf39	-1.2496	2.04962e-05	7.17635e-05
CDON	-1.24984	7.59946e-25	8.24216e-23
LOC152742	-1.25023	6.9687e-07	3.21523e-06
DLX6	-1.25073	4.854e-12	5.97314e-11
EMILIN3	-1.25074	6.0193e-10	4.93504e-09
PLD5	-1.25106	3.78551e-07	1.82744e-06
TMC5	-1.25109	6.51798e-09	4.35859e-08
DNALI1	-1.2524	4.17475e-19	1.8356e-17
GPAT2	-1.2526	1.68455e-10	1.53102e-09
CYP2W1	-1.25313	5.11926e-06	2.00028e-05
C2orf84	-1.25359	1.1137e-13	1.85694e-12
CYP26C1	-1.25387	1.25641e-06	5.48659e-06
SKINTL	-1.25409	2.69494e-07	1.33813e-06
FAM81A	-1.25413	2.10913e-16	5.75989e-15
PAMR1	-1.25417	4.49557e-14	8.09416e-13
SYT14	-1.25447	1.83612e-08	1.13087e-07
TPPP2	-1.25498	9.63775e-09	6.23429e-08
OXGR1	-1.25553	4.74738e-08	2.69709e-07
PPM1H	-1.256	1.33177e-14	2.66308e-13
METTL21C	-1.25639	9.1136e-06	3.40337e-05
CCDC33	-1.25651	1.80342e-07	9.24896e-07
LOC283888	-1.25747	4.8272e-12	5.94615e-11
CPAMD8	-1.25799	1.20404e-16	3.45816e-15
TNXB	-1.25803	1.13155e-12	1.56574e-11
IL12A	-1.25845	6.63113e-15	1.39071e-13
FMO6P	-1.25862	3.76479e-05	0.000125342
LGR6	-1.25921	9.76762e-10	7.67394e-09
NWD1	-1.25992	1.40537e-10	1.30808e-09
LOC100128531	-1.25995	3.46909e-12	4.36289e-11
LINC00479	-1.26097	2.25665e-10	2.00536e-09
EGFEM1P	-1.26122	4.09453e-08	2.36213e-07
SLAIN1	-1.26134	9.04623e-16	2.21307e-14
MYH7B	-1.2615	2.48283e-19	1.14704e-17
LOC286189	-1.26164	0.00019496	0.000560765
SELENBP1	-1.26223	2.09046e-16	5.72263e-15
NEURL	-1.26379	6.7565e-13	9.79542e-12
C19orf45	-1.26453	2.9014e-13	4.50458e-12
NRXN1	-1.26509	8.96074e-07	4.05101e-06
SCIN	-1.26513	4.88636e-13	7.29782e-12
CES3	-1.26543	1.51058e-12	2.03942e-11
OLFM1	-1.26585	2.91636e-10	2.52805e-09
ASTN1	-1.26589	1.53059e-07	7.93373e-07
LOC100128252	-1.26601	3.29288e-16	8.76154e-15
DBX2	-1.26695	0.000296699	0.000823797
DNAH12	-1.26746	5.2055e-13	7.72884e-12
WDR96	-1.26748	6.79381e-17	2.04948e-15
DPEP1	-1.26756	4.96204e-11	5.02961e-10
PGPEP1L	-1.26792	4.72233e-08	2.6842e-07
FBP2	-1.26799	2.15339e-11	2.34893e-10
PKHD1L1	-1.26822	6.12276e-10	5.01265e-09
SNORA47	-1.26828	4.34094e-05	0.000142772
MIR23C	-1.26836	0.0122412	0.0237261
CHAD	-1.26862	2.01583e-15	4.5392e-14
TDGF1P3	-1.26885	1.38452e-09	1.05465e-08
SHE	-1.26932	3.87913e-22	2.82272e-20
RIMS1	-1.26954	4.11502e-09	2.8427e-08
OTP	-1.26971	1.2098e-09	9.32155e-09
NRAP	-1.26991	0.00119462	0.00291563
LOC100506994	-1.26991	1.72165e-12	2.2958e-11
DUSP26	-1.27021	6.70008e-06	2.56429e-05
PARD3B	-1.27054	4.17857e-22	3.02771e-20
C8orf47	-1.27061	9.2843e-08	5.01207e-07
NEK10	-1.27161	2.22651e-16	6.04421e-15
LRRIQ1	-1.27189	4.96972e-09	3.38792e-08
WFDC2	-1.2724	4.09954e-06	1.63524e-05
ROBO2	-1.2729	4.572e-09	3.13178e-08
PP12613	-1.27296	4.02501e-05	0.000133208
BSN	-1.27306	2.22381e-21	1.41479e-19
CHPT1	-1.27404	8.72009e-25	9.32435e-23
PRCD	-1.27433	1.22728e-18	4.96494e-17
GFRA4	-1.27441	5.79601e-06	2.24125e-05
IGSF11	-1.27445	6.92556e-09	4.61218e-08
GPR137C	-1.275	2.12404e-25	2.57326e-23
EYA1	-1.27656	1.32213e-08	8.36932e-08
NRXN3	-1.27704	2.91298e-09	2.06236e-08
THBS4	-1.27745	5.25531e-07	2.47508e-06
CAMK2B	-1.27913	2.73923e-09	1.95293e-08
OR10AD1	-1.27934	2.65393e-07	1.32007e-06
POU3F3	-1.27952	1.50436e-10	1.3855e-09
ISYNA1	-1.27977	2.07821e-19	9.69947e-18
HGFAC	-1.27986	5.16565e-11	5.21049e-10
SEMA6C	-1.27988	4.06992e-19	1.79297e-17
CD79A	-1.28019	1.43929e-08	9.0207e-08
C1orf95	-1.28057	6.63092e-14	1.15729e-12
PDLIM3	-1.28068	4.41786e-09	3.03899e-08
TMEM163	-1.28088	6.08467e-14	1.07098e-12
KCNA1	-1.28323	8.24959e-09	5.39766e-08
AATK-AS1	-1.28359	5.46216e-07	2.56349e-06
SLC22A10	-1.28398	2.59721e-05	8.88957e-05
CXCR5	-1.28404	2.22658e-09	1.61763e-08
MYADML2	-1.28534	3.4052e-06	1.37805e-05
KCTD8	-1.28558	8.485e-08	4.60788e-07
LINC00284	-1.28678	0.000349013	0.000956572
HGC6.3	-1.28723	7.53858e-08	4.12341e-07
CALHM1	-1.28725	5.39487e-07	2.53557e-06
MUC20	-1.28802	8.91618e-10	7.05856e-09
CHST6	-1.28808	9.90026e-14	1.66781e-12
FXYD1	-1.28812	1.84616e-10	1.66792e-09
CAPS	-1.28824	1.40294e-15	3.28401e-14
NPTXR	-1.29057	8.02335e-13	1.1457e-11
GALNT8	-1.29072	2.87614e-06	1.17861e-05
PRSS38	-1.29076	1.43636e-05	5.16736e-05
ASB11	-1.29095	5.94881e-05	0.000191046
NTRK3	-1.29119	5.70478e-11	5.71381e-10
WDR69	-1.29157	2.69681e-05	9.20327e-05
UCN3	-1.29353	0.000932397	0.00233084
SIGLEC11	-1.29362	1.52006e-10	1.39769e-09
LINC00086	-1.29388	7.70189e-13	1.10326e-11
CCDC136	-1.29556	3.91868e-21	2.35493e-19
LOC285103	-1.29638	0.000701883	0.00180206
TCTE1	-1.29661	8.6042e-09	5.61356e-08
CEL	-1.29669	9.55614e-07	4.29122e-06
DOC2A	-1.29804	6.03262e-10	4.94241e-09
C1orf49	-1.29832	1.3689e-05	4.93713e-05
KRT40	-1.29841	5.44212e-07	2.55514e-06
PLA1A	-1.29885	1.83182e-16	5.04492e-15
DNMBP-AS1	-1.29906	1.25252e-10	1.17591e-09
CHRNA2	-1.29945	1.74533e-11	1.93234e-10
REM1	-1.30023	3.32291e-22	2.46523e-20
ZIC3	-1.30035	0.000257607	0.000724263
C7orf46	-1.30039	1.03091e-18	4.23065e-17
PRSS30P	-1.30091	4.97084e-15	1.06206e-13
FBN3	-1.301	9.29122e-07	4.18215e-06
MORN5	-1.30172	9.55941e-05	0.000294144
ZNF471	-1.30216	1.42051e-15	3.32172e-14
ZNF454	-1.30229	2.84841e-18	1.07946e-16
SCGB1A1	-1.30242	0.000135791	0.000404443
TXLNB	-1.30345	4.4644e-09	3.06916e-08
LOC440905	-1.30478	0.000229519	0.000651569
CLDN25	-1.30508	0.0107045	0.0210287
ZIC1	-1.30532	7.40948e-06	2.81545e-05
LCN8	-1.30568	1.64619e-05	5.86846e-05
CPNE4	-1.30751	4.83983e-08	2.74414e-07
STRA8	-1.30784	2.31788e-05	8.01095e-05
CNR1	-1.30794	3.90405e-10	3.31168e-09
UROC1	-1.30797	5.41042e-07	2.5413e-06
SORCS1	-1.30894	1.73791e-10	1.57512e-09
ZIC4	-1.30958	1.92166e-06	8.09614e-06
LTC4S	-1.3102	5.40562e-26	7.07577e-24
PTCH2	-1.31043	2.38717e-26	3.29516e-24
SLC9A11	-1.31043	9.59039e-09	6.20718e-08
LGI1	-1.31125	1.19286e-06	5.23378e-06
GCGR	-1.3114	4.62958e-07	2.20316e-06
KCNE3	-1.31168	4.92488e-14	8.7838e-13
C10orf107	-1.31184	4.16501e-15	8.99169e-14
PKIA	-1.31296	6.02075e-13	8.82423e-12
tAKR	-1.31326	3.51896e-10	3.00629e-09
ZBED3	-1.31459	1.94751e-24	1.96268e-22
WT1-AS	-1.31466	1.16637e-06	5.13042e-06
C21orf15	-1.31476	1.2886e-05	4.6764e-05
MSLN	-1.31633	1.99061e-06	8.36495e-06
MYO5C	-1.31639	4.66043e-17	1.4481e-15
CLRN1-AS1	-1.31662	2.09885e-06	8.79156e-06
XKR5	-1.31675	7.22226e-10	5.82487e-09
FCRL2	-1.31718	3.23772e-08	1.90401e-07
FAM180B	-1.31785	1.26766e-09	9.72781e-09
PCDH8	-1.31787	6.18752e-07	2.87782e-06
LOC283663	-1.31806	1.59552e-17	5.35194e-16
C2orf53	-1.31808	2.09226e-05	7.31104e-05
POU2AF1	-1.31818	7.85565e-12	9.20372e-11
NKAIN3	-1.3189	2.97514e-08	1.76187e-07
OSTN	-1.31946	4.4336e-05	0.000145504
AADAC	-1.31977	4.92109e-07	2.32972e-06
FIBCD1	-1.32035	1.53462e-06	6.58239e-06
TLE2	-1.32051	5.15041e-20	2.67211e-18
LOC100129722	-1.32101	2.17734e-12	2.85334e-11
PPP1R1B	-1.32167	9.16548e-06	3.42106e-05
GCK	-1.32244	3.2005e-08	1.88407e-07
KIT	-1.32295	9.31481e-19	3.84337e-17
PBX1	-1.32322	1.54317e-19	7.32234e-18
RAB42	-1.32328	7.21637e-19	3.03247e-17
FLJ41649	-1.32505	1.73399e-05	6.15064e-05
ART4	-1.32518	5.11338e-08	2.88487e-07
KCNH4	-1.32687	6.31159e-17	1.92183e-15
PLK5	-1.32722	3.17297e-09	2.23255e-08
CAND2	-1.32733	5.20457e-16	1.33041e-14
LINC00303	-1.32808	2.16238e-07	1.09251e-06
RPRML	-1.32842	3.05332e-06	1.24583e-05
HIGD1C	-1.32887	9.50133e-07	4.26913e-06
FLJ37505	-1.32944	0.000139101	0.000413437
CCDC42B	-1.32963	1.33674e-18	5.36014e-17
FIGF	-1.32969	2.71608e-08	1.62025e-07
MCF2L	-1.33109	7.22829e-24	6.71966e-22
FP588	-1.33122	1.93233e-15	4.37049e-14
RIBC2	-1.33129	1.73308e-16	4.80202e-15
FAM92B	-1.33192	1.41142e-08	8.85336e-08
GLYATL2	-1.33199	2.26799e-06	9.46251e-06
C11orf16	-1.33241	4.60858e-08	2.62807e-07
PABPC1L2A	-1.33253	0.000194973	0.000560765
TMEM38A	-1.33262	1.50915e-15	3.50821e-14
ZNF135	-1.33286	2.95305e-19	1.34249e-17
ZNF833P	-1.33289	3.42847e-21	2.08788e-19
CYP4X1	-1.33476	4.90794e-10	4.09613e-09
SYT9	-1.33512	9.79505e-08	5.26409e-07
MIR4750	-1.3356	5.77416e-11	5.78076e-10
GALNT9	-1.33609	1.77008e-12	2.35487e-11
ZNF648	-1.33621	1.99199e-06	8.36768e-06
ADRB3	-1.33776	2.18509e-15	4.87917e-14
TRPM5	-1.33847	4.61491e-08	2.62925e-07
FAM171A1	-1.33909	2.25526e-19	1.04828e-17
ITLN1	-1.34079	4.05358e-07	1.94695e-06
DMRT1	-1.34108	3.93137e-06	1.57282e-05
C6	-1.34194	7.87987e-05	0.000247104
KLHL35	-1.34225	6.39731e-11	6.36003e-10
UBD	-1.34326	3.76281e-10	3.20022e-09
NT5C1A	-1.34379	2.3528e-06	9.793e-06
RGAG4	-1.34398	1.24677e-23	1.11797e-21
ARHGEF26	-1.34455	3.39967e-11	3.56989e-10
LOC219731	-1.34607	1.10509e-11	1.2648e-10
AQP2	-1.34609	2.84188e-09	2.01892e-08
RFPL1-AS1	-1.34751	1.95171e-08	1.19592e-07
PTGER1	-1.3477	6.59987e-11	6.54413e-10
ANKRD45	-1.34812	1.75766e-13	2.84001e-12
PRAMEF12	-1.34824	0.000294553	0.000818539
ALLC	-1.34981	6.29179e-09	4.21724e-08
EXTL1	-1.35017	5.24153e-10	4.34745e-09
LOC400084	-1.3505	8.09866e-06	3.05238e-05
TNNC2	-1.35107	3.55183e-06	1.43364e-05
TCF15	-1.35153	8.23532e-10	6.56979e-09
FAM83E	-1.35212	5.20942e-15	1.10888e-13
CLU	-1.35242	1.41578e-14	2.80643e-13
MNX1	-1.35243	9.38127e-13	1.3222e-11
CTTNBP2	-1.35289	1.55955e-11	1.73948e-10
LOC400550	-1.3534	1.20883e-11	1.37524e-10
BRDT	-1.35347	0.000254175	0.000715322
ZNF620	-1.3538	6.90522e-29	1.46984e-26
PRKAA2	-1.35393	5.34828e-10	4.42311e-09
CTCFL	-1.35536	0.00604868	0.0126274
PLN	-1.35557	1.67644e-09	1.25353e-08
AVP	-1.3559	2.08985e-05	7.30374e-05
CERS1	-1.35602	7.34076e-13	1.05352e-11
RSPH1	-1.35643	1.25766e-12	1.72453e-11
FAM19A1	-1.35658	4.47855e-11	4.58855e-10
HMX1	-1.35795	8.57939e-07	3.89406e-06
LRRC14B	-1.35829	1.20011e-07	6.34048e-07
CNTN4	-1.35893	5.17382e-13	7.69184e-12
KLHL32	-1.35899	5.06356e-18	1.83351e-16
TSPAN12	-1.36076	2.75226e-25	3.23121e-23
C17orf104	-1.36122	7.42563e-31	2.19644e-28
OR2H2	-1.36227	5.39729e-08	3.02929e-07
TLX3	-1.36386	0.000112066	0.000338876
EMID1	-1.36406	3.99637e-14	7.30507e-13
WNT8B	-1.36518	1.03094e-12	1.43788e-11
KLHDC9	-1.36534	7.97938e-17	2.37567e-15
KIAA1211	-1.3658	3.3186e-20	1.77846e-18
SYN2	-1.36625	8.16508e-10	6.51833e-09
CHST5	-1.36638	1.26206e-17	4.27113e-16
CDO1	-1.3667	1.47961e-10	1.36673e-09
ICA1	-1.36708	2.48737e-20	1.36184e-18
ZNF853	-1.36741	4.26924e-18	1.57086e-16
CYP11A1	-1.36765	2.54209e-08	1.52165e-07
RADIL	-1.36791	1.81672e-21	1.16886e-19
GLB1L2	-1.36793	1.09152e-10	1.03801e-09
WNK3	-1.36803	3.67851e-12	4.60592e-11
C1orf61	-1.3682	1.38371e-08	8.71311e-08
SLC22A16	-1.36888	1.69e-12	2.25756e-11
LOC541473	-1.36893	6.04888e-18	2.15939e-16
FAM211A	-1.3695	6.05291e-34	2.50656e-31
LOC283481	-1.36965	2.11371e-18	8.17349e-17
PTPRVP	-1.37005	8.16139e-14	1.40502e-12
KCNH2	-1.37068	7.17995e-14	1.24547e-12
B4GALNT2	-1.37131	1.07942e-06	4.79236e-06
ZNF280B	-1.37291	7.44777e-17	2.22905e-15
SULT1C2	-1.37309	4.5168e-10	3.79332e-09
IYD	-1.37339	9.41006e-10	7.42375e-09
ADCY2	-1.37377	2.89195e-09	2.04938e-08
KIAA1456	-1.37442	7.72545e-16	1.91255e-14
TNFRSF13B	-1.37499	6.16499e-09	4.13956e-08
HEPACAM	-1.37576	7.18666e-09	4.76655e-08
DPY19L2P4	-1.37654	6.97278e-13	1.00514e-11
NAALADL2	-1.37682	4.25451e-14	7.71503e-13
SLC7A10	-1.37698	2.5215e-09	1.81052e-08
KIAA0408	-1.37802	0.000567696	0.00148887
TRIM72	-1.37824	6.98394e-07	3.22127e-06
EPHA5	-1.38062	1.84959e-10	1.66969e-09
WNK4	-1.38073	2.16451e-13	3.43071e-12
CECR3	-1.3822	5.57924e-06	2.16589e-05
KL	-1.38235	7.45247e-22	5.03672e-20
GKAP1	-1.38248	5.73196e-28	1.08793e-25
NPY1R	-1.38404	1.89563e-09	1.40042e-08
LOC100132146	-1.38457	0.000388024	0.00105335
BEX2	-1.3849	3.08104e-12	3.92032e-11
CNTD1	-1.3855	9.40271e-23	7.75928e-21
KCNC1	-1.38601	1.03147e-15	2.49658e-14
KATNAL2	-1.38607	2.30658e-20	1.27203e-18
TRIM42	-1.3873	3.31689e-05	0.000111589
TRIM49L2	-1.38788	0.000735175	0.00188075
AMY2A	-1.39152	7.91576e-10	6.33929e-09
LOC100129175	-1.39304	0.000108065	0.000328041
PLIN4	-1.39389	1.93178e-13	3.09194e-12
RTDR1	-1.39392	2.69181e-15	5.94653e-14
LOC100124692	-1.39555	6.25714e-07	2.90842e-06
RBM20	-1.396	2.62116e-18	1.00167e-16
SCUBE2	-1.39748	8.29155e-17	2.46217e-15
ADH1A	-1.39803	5.23959e-07	2.4687e-06
GNG8	-1.39807	9.61672e-13	1.35371e-11
ARMC4	-1.39891	3.78822e-09	2.63532e-08
PRODH2	-1.39946	6.19689e-06	2.38493e-05
PHF21B	-1.39963	3.21411e-13	4.94625e-12
KCNJ10	-1.39973	1.6595e-11	1.84285e-10
BHMT	-1.40039	2.06564e-10	1.85006e-09
LOC283761	-1.40092	1.16083e-10	1.09797e-09
CXorf41	-1.40141	0.000133392	0.000397871
ZCCHC18	-1.40279	4.19149e-25	4.82149e-23
ADAMTS19	-1.40369	2.37774e-11	2.57637e-10
REEP2	-1.40379	9.89228e-19	4.06691e-17
LOC399829	-1.40433	1.36035e-10	1.26877e-09
LOC339874	-1.40484	6.60226e-22	4.57061e-20
LOC729966	-1.40544	1.63678e-07	8.45521e-07
C1orf158	-1.40619	0.000255904	0.000719832
CLIC5	-1.40647	3.7165e-15	8.07701e-14
SYNPO2	-1.40686	1.16996e-09	9.05436e-09
LCN12	-1.40695	7.71116e-12	9.06241e-11
OR7C1	-1.40727	1.12972e-06	4.98655e-06
NPHS1	-1.41	7.08771e-12	8.39467e-11
GAS2	-1.41021	5.5776e-18	2.00056e-16
SRL	-1.41027	8.67655e-08	4.70405e-07
WDR17	-1.41043	2.67907e-12	3.44932e-11
GLOD5	-1.41064	1.69267e-09	1.264e-08
FAM123A	-1.41131	1.43335e-09	1.0882e-08
SHISA9	-1.41255	2.21565e-08	1.34284e-07
C1orf130	-1.41379	5.67215e-13	8.35633e-12
NTS	-1.4148	0.000539486	0.00142116
USH1C	-1.41578	4.13962e-06	1.64976e-05
TAL2	-1.41604	8.23472e-15	1.70194e-13
FLJ23152	-1.41643	4.50143e-08	2.57477e-07
SLC7A2	-1.41669	2.15582e-14	4.14705e-13
MAGEB10	-1.41714	0.000189998	0.000548379
SEC14L5	-1.41769	9.131e-24	8.35211e-22
LOC401431	-1.41877	2.97016e-24	2.9285e-22
CENPV	-1.42061	6.01625e-21	3.5316e-19
LOC100287718	-1.42069	2.37361e-05	8.18491e-05
TPO	-1.42087	1.76035e-14	3.44695e-13
BPIFA1	-1.42115	0.00352457	0.00776436
KCNA4	-1.42155	2.55562e-09	1.83213e-08
KRT38	-1.42198	3.66193e-11	3.81189e-10
ZYG11A	-1.42205	4.71757e-11	4.80319e-10
GLT25D2	-1.42227	9.58454e-11	9.23815e-10
TRPV6	-1.42312	1.20626e-10	1.13575e-09
CR1L	-1.4237	5.06136e-13	7.5386e-12
SNTN	-1.42389	6.05653e-05	0.000194177
ENTPD8	-1.42448	5.83733e-08	3.2594e-07
HUNK	-1.4246	1.21389e-20	6.91189e-19
C19orf46	-1.42487	8.51591e-10	6.77229e-09
NME5	-1.42601	1.14952e-13	1.91106e-12
LCN15	-1.42602	9.03384e-07	4.08122e-06
CDH12	-1.4263	1.28546e-06	5.60123e-06
SLC22A8	-1.42673	5.07874e-06	1.98581e-05
SLC28A2	-1.42678	1.05217e-09	8.20974e-09
VTCN1	-1.42681	5.55537e-08	3.11035e-07
SOX21	-1.4275	3.10514e-11	3.28943e-10
CP	-1.42811	9.32753e-08	5.03302e-07
GPR62	-1.42988	3.22557e-20	1.73268e-18
RTBDN	-1.43042	1.42017e-10	1.32024e-09
TRPV5	-1.43048	5.25698e-11	5.2909e-10
KDM4DL	-1.43236	1.22259e-08	7.78682e-08
FGF18	-1.43241	2.46588e-18	9.43913e-17
LINC00469	-1.4335	8.51143e-09	5.5594e-08
FLJ40194	-1.43393	7.57563e-06	2.86949e-05
ACSL6	-1.43414	4.16335e-14	7.5799e-13
MYL3	-1.43443	1.33076e-06	5.77973e-06
BLK	-1.43493	1.91155e-10	1.72085e-09
LRRC31	-1.43546	2.59328e-05	8.88188e-05
ZNF804B	-1.43582	1.39676e-06	6.04686e-06
CD200	-1.43706	1.81776e-22	1.43257e-20
SLC24A5	-1.43716	1.68682e-08	1.04371e-07
KIAA1324	-1.43759	3.61419e-11	3.76736e-10
PLEKHB1	-1.43814	6.85869e-22	4.73374e-20
BTN1A1	-1.43814	4.25085e-14	7.71453e-13
LOC158696	-1.43828	1.40153e-09	1.06617e-08
ABCA8	-1.43851	3.20267e-12	4.05696e-11
SYP	-1.43864	3.02426e-29	6.95762e-27
C11orf40	-1.43896	0.000298103	0.000827495
KERA	-1.44027	7.83831e-09	5.15225e-08
SHH	-1.44147	8.35734e-07	3.80161e-06
FABP7	-1.44182	8.66053e-08	4.6976e-07
CACNA1E	-1.44233	2.6603e-18	1.01323e-16
C4orf19	-1.44242	8.29941e-11	8.09539e-10
ENPP4	-1.44249	1.43705e-21	9.3783e-20
RFPL4B	-1.44271	1.14808e-07	6.09383e-07
KCNK2	-1.4433	1.75818e-13	2.84001e-12
GPC3	-1.44637	3.5429e-08	2.06852e-07
FAM153C	-1.44698	2.48248e-06	1.02858e-05
LOC730101	-1.44717	2.07981e-12	2.73655e-11
LOC728723	-1.44728	5.56086e-24	5.27725e-22
PLA2G2D	-1.44836	3.15145e-08	1.85711e-07
TFF3	-1.44992	2.11521e-08	1.28813e-07
RBP2	-1.44995	2.24168e-10	1.9944e-09
COL4A3	-1.45034	2.53376e-17	8.13947e-16
CA7	-1.45066	2.88923e-12	3.70108e-11
KCNT1	-1.45074	3.91909e-12	4.8937e-11
SNAP25	-1.45084	2.49106e-17	8.01363e-16
OR13A1	-1.45143	1.90529e-10	1.71657e-09
AGT	-1.45214	8.087e-13	1.15304e-11
FABP2	-1.45317	1.13444e-06	5.00541e-06
TLR10	-1.45347	7.69612e-16	1.90944e-14
PPP1R42	-1.45406	1.49539e-06	6.42621e-06
ZDHHC15	-1.45413	1.58758e-15	3.66349e-14
PTX4	-1.45416	1.66459e-05	5.92664e-05
LOC84931	-1.45437	4.78719e-06	1.87858e-05
MIR4321	-1.45491	0.000354625	0.000969738
PNMA2	-1.45532	4.29925e-19	1.8867e-17
LOC643037	-1.45615	0.00161423	0.00383256
SLC16A8	-1.45683	1.29724e-16	3.69787e-15
CSN2	-1.45818	0.00029934	0.000830523
LOC284950	-1.45847	1.15042e-16	3.3167e-15
RGS22	-1.45966	3.85382e-15	8.35948e-14
PCDH19	-1.46051	5.56722e-09	3.76706e-08
FCN2	-1.4613	4.5991e-08	2.62391e-07
CLDN11	-1.46218	1.91769e-22	1.49579e-20
PRKCG	-1.46227	1.59677e-10	1.46115e-09
NTN3	-1.46241	4.45763e-15	9.57801e-14
LOC84856	-1.46352	2.99895e-13	4.64022e-12
HIF3A	-1.46557	2.10888e-10	1.88508e-09
C7orf72	-1.46576	0.00224377	0.00517459
FGF14-IT1	-1.46597	8.58753e-07	3.89698e-06
DNAH7	-1.46667	1.59118e-21	1.03545e-19
MYBPC1	-1.46675	6.68526e-05	0.000212303
FAM198A	-1.46678	7.18942e-18	2.53085e-16
BCAS1	-1.46687	3.76097e-14	6.90248e-13
PRR15L	-1.46776	1.60406e-13	2.60772e-12
TLX2	-1.46836	1.32294e-10	1.23691e-09
DCX	-1.46853	2.03791e-12	2.68453e-11
FAM55D	-1.47017	9.2305e-08	4.98539e-07
SCGB2A1	-1.47055	2.50293e-06	1.03573e-05
TMEM212	-1.47067	0.000588845	0.00153779
KLKB1	-1.47181	3.4772e-17	1.09995e-15
C2orf73	-1.47366	6.73011e-11	6.65877e-10
PAK7	-1.47416	1.75308e-05	6.20891e-05
LOC401134	-1.47468	1.59859e-05	5.71309e-05
SCG3	-1.47559	7.01094e-13	1.01e-11
LRRIQ4	-1.47583	4.27686e-14	7.74323e-13
KCNJ11	-1.47686	5.71369e-16	1.44755e-14
CCDC108	-1.47734	1.33521e-11	1.50697e-10
LOC284215	-1.4778	2.21438e-05	7.70231e-05
SYCE2	-1.47835	1.87379e-19	8.83593e-18
LOC645206	-1.47843	1.82205e-16	5.02409e-15
PADI2	-1.48035	7.0586e-12	8.36455e-11
AQP12B	-1.48055	9.91127e-07	4.43883e-06
GPR26	-1.48082	4.72929e-12	5.83185e-11
SLC5A2	-1.483	9.42494e-17	2.76271e-15
C16orf89	-1.48327	1.48147e-12	2.00487e-11
TMEM145	-1.48432	1.46625e-16	4.11273e-15
ZNF667	-1.48441	8.38222e-17	2.48585e-15
SLITRK5	-1.48444	1.70204e-09	1.26934e-08
C9orf24	-1.486	3.50304e-16	9.28816e-15
KIF1A	-1.48605	3.60444e-07	1.74595e-06
CRYM	-1.48631	5.88778e-12	7.10652e-11
RNF157	-1.48731	1.28664e-27	2.25419e-25
BMPER	-1.488	3.69884e-16	9.76186e-15
HAND2	-1.49063	1.0841e-13	1.81422e-12
WFDC6	-1.49199	0.000918397	0.00230026
LOC254099	-1.49244	1.43611e-09	1.08993e-08
COCH	-1.49249	2.32355e-09	1.68057e-08
TRPM3	-1.49293	4.77414e-17	1.47824e-15
GSTA2	-1.4941	2.56501e-09	1.83829e-08
RAB9B	-1.49437	2.63111e-21	1.66e-19
FSTL4	-1.49469	2.65518e-15	5.87131e-14
MUC4	-1.49499	1.35859e-07	7.09705e-07
FAM95B1	-1.49569	2.6132e-12	3.37023e-11
CXorf61	-1.49685	0.00558577	0.0117417
FLJ16171	-1.49851	0.000457675	0.00122391
UGT3A1	-1.4993	1.61969e-06	6.91345e-06
LOC100506421	-1.50056	1.97514e-07	1.00325e-06
PODXL2	-1.5017	1.99437e-14	3.86256e-13
DBX1	-1.50326	1.45057e-06	6.25248e-06
ESRRB	-1.50431	2.37418e-11	2.57375e-10
AACSP1	-1.50454	6.66709e-11	6.60216e-10
SCN11A	-1.50466	1.18374e-19	5.71205e-18
MAPK4	-1.50475	6.5197e-11	6.47309e-10
CCDC74B	-1.50522	3.22995e-21	1.99364e-19
KRTAP10-12	-1.50533	0.000338433	0.000930149
PACRG	-1.50648	3.87477e-14	7.09991e-13
CDH23	-1.50727	5.9359e-26	7.6816e-24
PNMT	-1.50739	4.3171e-11	4.44111e-10
DHRS7C	-1.5075	4.88619e-05	0.000159324
LOC100505545	-1.50763	8.48317e-05	0.000264349
CYP2A13	-1.50831	2.27558e-06	9.48893e-06
CACNB4	-1.50836	8.04001e-16	1.98396e-14
ALOX15	-1.50906	4.20782e-08	2.42312e-07
TEX15	-1.50918	7.61548e-05	0.000239605
LOC100652791	-1.51021	2.02184e-11	2.21285e-10
EYA2	-1.5103	3.61775e-13	5.53378e-12
FGF20	-1.51135	4.44288e-07	2.12052e-06
TMPRSS2	-1.51245	1.38393e-09	1.05455e-08
COL23A1	-1.51262	7.83077e-25	8.4129e-23
CYP4F12	-1.51274	1.87059e-11	2.05719e-10
OXER1	-1.51357	3.03111e-22	2.26349e-20
MT3	-1.51497	8.26195e-08	4.49317e-07
CCL19	-1.51546	3.58648e-11	3.7419e-10
HOXA-AS3	-1.51559	1.44311e-10	1.33829e-09
ADIG	-1.5156	4.14075e-05	0.000136621
LRRC26	-1.51593	7.31856e-08	4.01173e-07
CLEC4F	-1.51675	1.88578e-17	6.17992e-16
SLC6A4	-1.52186	1.45243e-10	1.34583e-09
LOC100507537	-1.52209	0.000336492	0.000925149
FAM150A	-1.52225	2.35775e-07	1.18256e-06
RGS7BP	-1.52316	3.20365e-10	2.75345e-09
LOC286367	-1.5242	7.01625e-35	3.26127e-32
RIC3	-1.52446	4.80476e-17	1.48485e-15
CHRDL1	-1.5254	2.20701e-09	1.60546e-08
LOC149134	-1.52651	2.02663e-15	4.55212e-14
ZNF385C	-1.52702	1.06173e-23	9.67282e-22
SVIP	-1.52752	1.35613e-24	1.41685e-22
TMEM235	-1.52852	4.01054e-09	2.77641e-08
NOVA1	-1.52892	1.72037e-18	6.73248e-17
IGFALS	-1.52918	1.49558e-18	5.92405e-17
SLC13A2	-1.52937	6.64246e-10	5.39609e-09
TMEM190	-1.53105	2.24851e-16	6.08944e-15
TMEM150C	-1.53189	2.69979e-22	2.04287e-20
PROKR2	-1.53292	6.87338e-05	0.000217882
LOC283089	-1.53324	3.95594e-14	7.23699e-13
LOC339529	-1.53364	4.83446e-09	3.30461e-08
GDF10	-1.53372	5.62193e-13	8.2877e-12
CXXC4	-1.53419	6.34011e-22	4.40251e-20
GLS2	-1.53419	2.69168e-18	1.02347e-16
AQP5	-1.53504	1.57905e-07	8.17371e-07
NR0B1	-1.53523	0.000183401	0.000530971
TJP3	-1.53744	8.88332e-15	1.82935e-13
MIOX	-1.53768	2.22534e-08	1.34763e-07
LOC100144602	-1.53783	8.25858e-05	0.00025788
SNTG2	-1.53839	1.33937e-15	3.13843e-14
ENHO	-1.54127	5.18054e-14	9.22533e-13
AGR3	-1.54317	2.29257e-05	7.9331e-05
KLHL33	-1.54408	3.8038e-10	3.23025e-09
FAM189A2	-1.54497	1.83282e-17	6.01502e-16
CACNA1D	-1.54713	8.53623e-23	7.09566e-21
MEI1	-1.5473	9.71293e-14	1.63868e-12
SPSB4	-1.5474	9.26428e-14	1.5723e-12
SLC44A4	-1.54768	5.26475e-11	5.29404e-10
SORCS3	-1.54892	7.48441e-09	4.94819e-08
LOC283174	-1.55005	1.05489e-15	2.54246e-14
C1orf87	-1.55365	0.000133973	0.000399395
MESP1	-1.55476	4.81782e-16	1.23882e-14
TBX5	-1.55587	2.22501e-07	1.12142e-06
LOC254559	-1.55691	5.41283e-13	8.02099e-12
TCERG1L	-1.55692	1.10778e-10	1.0526e-09
NDST3	-1.55733	7.74399e-17	2.3086e-15
PROM1	-1.55779	2.11375e-07	1.06937e-06
FLJ30838	-1.55787	4.643e-14	8.33326e-13
UPK3A	-1.5606	2.73093e-20	1.48095e-18
ZNF663	-1.56288	8.43518e-07	3.83625e-06
STOX1	-1.56295	2.89831e-14	5.42416e-13
CPNE6	-1.56301	2.11818e-07	1.07137e-06
HS3ST6	-1.56337	3.09739e-09	2.18341e-08
BEX1	-1.56441	2.4356e-09	1.75548e-08
FAM69C	-1.56564	2.42927e-07	1.21549e-06
P2RX3	-1.56694	1.83999e-08	1.13233e-07
CSN3	-1.56865	6.35543e-05	0.000202875
KAAG1	-1.56873	6.0176e-09	4.05254e-08
EPHB1	-1.56893	1.03625e-18	4.24486e-17
NXPH2	-1.56904	1.01001e-06	4.51411e-06
DNAH6	-1.57202	7.10691e-19	2.992e-17
LOC100505989	-1.57319	1.87927e-10	1.6938e-09
FEZF2	-1.57379	4.31094e-11	4.43879e-10
TMEM139	-1.57481	1.83497e-12	2.43409e-11
CFTR	-1.57566	4.20532e-08	2.42237e-07
COL9A2	-1.57607	2.75965e-21	1.7363e-19
TG	-1.57795	4.74806e-16	1.22332e-14
UGT2A3	-1.57856	2.42052e-06	1.00455e-05
C11orf53	-1.57881	1.68486e-11	1.8701e-10
SEMA3E	-1.57906	2.37093e-09	1.71266e-08
MYEF2	-1.57954	6.95448e-20	3.51209e-18
CXorf59	-1.5796	6.73493e-06	2.5772e-05
MUC13	-1.58034	3.49758e-09	2.44284e-08
NRG3	-1.58251	9.17117e-14	1.55766e-12
DYDC2	-1.58453	7.02687e-11	6.92532e-10
WFIKKN2	-1.58495	5.95115e-10	4.88444e-09
C16orf73	-1.58515	5.04404e-07	2.38346e-06
CYP4Z1	-1.58524	6.82471e-10	5.53757e-09
AGR2	-1.58677	9.99061e-14	1.68055e-12
NEFH	-1.58857	3.28606e-08	1.92907e-07
AP3B2	-1.58887	1.68859e-15	3.8682e-14
TSGA10IP	-1.58927	6.89452e-10	5.58233e-09
MEGF10	-1.5898	7.77484e-15	1.61569e-13
ASRGL1	-1.59241	4.21093e-24	4.04675e-22
LYZL4	-1.59346	0.000290621	0.000808598
GPR128	-1.59347	5.48857e-07	2.57535e-06
FCRL1	-1.59362	2.24284e-10	1.99465e-09
GRIN2C	-1.59657	8.10117e-20	4.01988e-18
GCM2	-1.59727	2.1464e-07	1.08492e-06
CYP2E1	-1.59814	2.31231e-14	4.41452e-13
UCP1	-1.59821	1.41148e-11	1.5852e-10
SLC4A4	-1.5984	1.67826e-15	3.85322e-14
ZNF157	-1.59878	3.95213e-13	6.01293e-12
TMEM178	-1.59911	1.96012e-16	5.39175e-15
LSAMP	-1.60012	1.8451e-19	8.71865e-18
ENPP3	-1.60036	1.58283e-16	4.42338e-15
GABRA1	-1.60182	4.78771e-07	2.27082e-06
LOC100507334	-1.60228	1.59967e-08	9.96012e-08
CYP4F35P	-1.60285	3.07701e-11	3.26418e-10
MOS	-1.60417	0.000348153	0.000954675
CLIC6	-1.60542	1.21481e-17	4.12962e-16
KRTAP3-1	-1.60712	6.22359e-06	2.39481e-05
NMUR1	-1.60879	7.85486e-20	3.90616e-18
CYP26A1	-1.60881	1.76502e-06	7.48327e-06
CAPN9	-1.60886	1.69298e-11	1.87728e-10
FIGLA	-1.60919	2.03454e-06	8.53736e-06
ASB4	-1.60984	1.53217e-11	1.7123e-10
IGFBPL1	-1.61035	2.8865e-11	3.08363e-10
CCDC74A	-1.61133	1.52176e-24	1.57543e-22
ZMAT1	-1.61275	1.15689e-19	5.60766e-18
ESRRG	-1.6129	1.59281e-12	2.13777e-11
ALDH1L1	-1.61338	5.54117e-12	6.72022e-11
LOC255167	-1.61352	1.28251e-11	1.45038e-10
C2orf65	-1.61486	1.13291e-10	1.07468e-09
C5orf49	-1.61528	7.71146e-13	1.10394e-11
RPRM	-1.61536	2.69832e-12	3.47018e-11
CLPSL2	-1.61612	3.37541e-06	1.36697e-05
REN	-1.61614	1.22229e-12	1.68335e-11
VPREB3	-1.61705	1.24586e-15	2.94967e-14
CSH2	-1.61874	0.000575635	0.00150749
C3orf25	-1.61897	1.51821e-22	1.20483e-20
PAH	-1.61914	8.66398e-09	5.64932e-08
LOC100505474	-1.61928	1.48422e-10	1.36972e-09
SYCP1	-1.61975	1.68979e-07	8.70346e-07
LRMP	-1.62003	8.6793e-21	5.01725e-19
BCORP1	-1.62095	6.85532e-10	5.55647e-09
NEU4	-1.62449	2.53676e-16	6.83754e-15
PRB3	-1.62615	3.63036e-11	3.78248e-10
CNKSR2	-1.62678	3.97322e-18	1.47145e-16
MKRN7P	-1.62745	5.01078e-09	3.41387e-08
LMO3	-1.62857	3.32251e-15	7.24843e-14
NOS2	-1.62945	2.50036e-11	2.7028e-10
ELN	-1.63086	1.64923e-17	5.50775e-16
SP9	-1.6309	1.22599e-14	2.47985e-13
CCDC160	-1.63269	1.19182e-09	9.19228e-09
DCAF12L2	-1.63346	7.09825e-11	6.99264e-10
GABBR2	-1.63347	1.03111e-15	2.49658e-14
SLC9A4	-1.63579	6.15369e-09	4.13319e-08
CPEB1	-1.63639	1.99947e-15	4.51679e-14
C8orf85	-1.63902	3.4039e-12	4.28565e-11
ALDH1A2	-1.63935	2.69932e-15	5.95734e-14
YPEL1	-1.6403	6.92386e-54	1.97122e-50
GSTA1	-1.64031	3.82818e-05	0.000127248
PDE6B	-1.64055	2.74793e-19	1.25174e-17
IFLTD1	-1.64071	2.91698e-10	2.52805e-09
KIAA1683	-1.64627	1.76688e-28	3.62544e-26
TDRD9	-1.64769	4.31467e-14	7.79309e-13
OCA2	-1.64958	2.21395e-10	1.97203e-09
EPHA7	-1.65065	4.35897e-09	3.00121e-08
AMH	-1.65071	4.27783e-15	9.21777e-14
CELP	-1.65177	3.99645e-09	2.7675e-08
MIR1-2	-1.65296	0.00505473	0.0107254
DLGAP1	-1.65394	2.28494e-14	4.36958e-13
XPNPEP2	-1.65809	6.69827e-17	2.02872e-15
BPIFB1	-1.65823	0.00028889	0.00080437
LOC100144604	-1.65827	8.99724e-11	8.72376e-10
C1orf173	-1.65876	7.94152e-12	9.28999e-11
NLGN1	-1.66217	1.24313e-12	1.70666e-11
ARHGEF33	-1.66264	1.31721e-18	5.29633e-17
ZFHX2	-1.66384	7.47772e-37	4.86607e-34
CHST9	-1.66436	9.56091e-07	4.29252e-06
FOXA3	-1.6649	6.62635e-14	1.15729e-12
TMEM151B	-1.66501	3.32409e-11	3.49536e-10
FXYD6-FXYD2	-1.66685	7.09628e-05	0.00022451
HMSD	-1.66773	4.00597e-17	1.25502e-15
DNMT3L	-1.66794	3.69313e-11	3.83735e-10
FAM150B	-1.66866	7.54183e-16	1.87935e-14
ELOVL2	-1.66979	6.48099e-24	6.12493e-22
ECEL1P2	-1.67026	1.81393e-07	9.29869e-07
HCAR1	-1.67156	9.63393e-10	7.5786e-09
RNF165	-1.67203	1.78726e-22	1.41342e-20
AMOT	-1.67218	3.64954e-18	1.3582e-16
SLC5A7	-1.67276	3.07527e-05	0.000104028
KBTBD12	-1.67355	5.57566e-08	3.12018e-07
SOX10	-1.67383	2.46016e-14	4.68499e-13
FCER2	-1.6769	3.56843e-12	4.48041e-11
ALDH1A1	-1.67724	4.86473e-12	5.98268e-11
TBX20	-1.67879	8.28468e-06	3.11527e-05
WSCD2	-1.67884	5.79747e-10	4.76862e-09
CLPS	-1.67911	2.2202e-05	7.71903e-05
DDC	-1.67926	4.93958e-11	5.00907e-10
C7	-1.67991	2.71987e-09	1.94194e-08
LOC284276	-1.68048	4.20227e-18	1.54872e-16
UGT1A8	-1.68062	4.85127e-05	0.000158345
LOC93432	-1.68114	7.36037e-07	3.37847e-06
LINC00028	-1.68171	4.12218e-12	5.12762e-11
VWCE	-1.68454	4.52806e-30	1.17195e-27
CCDC67	-1.68586	6.80533e-12	8.0939e-11
MCF2L-AS1	-1.68737	3.25501e-11	3.437e-10
BEND5	-1.68756	2.62832e-20	1.43332e-18
SLITRK3	-1.68765	2.89145e-09	2.04938e-08
RHOXF1	-1.68998	2.87498e-10	2.49735e-09
SOX30	-1.69071	1.52086e-13	2.48487e-12
WNK2	-1.69117	6.68375e-14	1.16561e-12
SOHLH1	-1.692	0.000182866	0.000529623
CYP4B1	-1.69213	6.92193e-11	6.83669e-10
LTF	-1.69522	8.14472e-07	3.71082e-06
LINC00466	-1.69618	2.12736e-13	3.37885e-12
LOC645591	-1.6969	5.17279e-08	2.9155e-07
BCL2	-1.70009	2.53688e-37	1.75091e-34
FSTL5	-1.70034	4.321e-06	1.7142e-05
RGL3	-1.70039	1.14317e-26	1.71294e-24
MYRIP	-1.70111	1.45117e-23	1.28108e-21
TRIM48	-1.70162	0.00368871	0.00809151
LOC389332	-1.70199	8.2284e-13	1.16953e-11
SNAP91	-1.70263	2.3535e-14	4.48563e-13
SYCP3	-1.70309	2.69975e-35	1.30829e-32
NOBOX	-1.70336	0.00034396	0.000943973
GOLT1A	-1.70367	2.1159e-10	1.89061e-09
SLC2A4	-1.7039	4.46507e-20	2.32844e-18
RBP3	-1.70421	7.7823e-20	3.87855e-18
TEKT2	-1.70563	3.52047e-21	2.13819e-19
DUSP15	-1.70591	1.1194e-27	2.00752e-25
CTXN2	-1.70613	8.07349e-05	0.00025262
GSTA5	-1.70758	0.000170288	0.000496287
DSCR6	-1.70775	1.10787e-14	2.26303e-13
CEACAM16	-1.70795	4.06191e-12	5.06094e-11
FXYD2	-1.70886	2.35017e-15	5.21711e-14
C9orf172	-1.70979	6.33404e-27	1.02315e-24
HOXB-AS5	-1.71318	5.31095e-06	2.06914e-05
[truncated: 368 more rows]
